# Supplementary material for: Efficient total synthesis of (+)-negamycin, a potential chemotherapeutic agent for genetic diseases
Source: Royal Society of Chemistry journal article supplement (doi:10.1039/b801498a), 2008-01-01

# Efficient Total Synthesis of (+)-Negamycin, a Potential Chemotherapeutic Agent for Genetic Diseases.

Yoshio Hayashi,<sup>1,2</sup> Tomas Regnier,<sup>1</sup> Shigenobu Nishiguchi,<sup>1</sup> Magne O. Sydnes,<sup>1</sup> Daisuke Hashimoto,<sup>3</sup>  
Junya Hasegawa,<sup>3</sup> Takahiro Katoh,<sup>3</sup> Tetsuya Kajimoto,<sup>3</sup> Masataka Shiozuka,<sup>4</sup> Ryoichi Matsuda,<sup>4</sup>  
Manabu Node,<sup>3</sup> Yoshiaki Kiso.<sup>1</sup>

<sup>1</sup>Department of Medicinal Chemistry, Kyoto Pharmaceutical University, Kyoto 607-8412, Japan; <sup>2</sup>Department of Medicinal Chemistry, School of Pharmacy, Tokyo University of Pharmacy and Life Sciences, Hachioji, Tokyo 192-0392, Japan; <sup>3</sup>Department of Pharmaceutical Manufacturing Chemistry, Kyoto Pharmaceutical University, Kyoto 607-8412, Japan; <sup>4</sup>Department of Life Science, The University of Tokyo, Meguro-ku, Tokyo 153-8902, Japan.

## Supporting information

-----

**p2 --- Additional data**

**p3-p7 --- Experimental part**

**p8-p23 --- NMR Data**

## Additional Data

**Table A.** Optimization for CM reaction

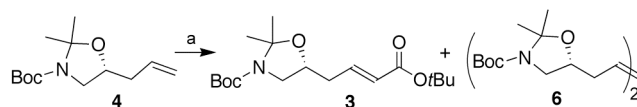

| Entry | Catalyst        | Conditions     | Conversion (%) <sup>c</sup> | <b>3/6</b> ratio <sup>c</sup> |
|-------|-----------------|----------------|-----------------------------|-------------------------------|
| 1     | [Ru]- <b>I</b>  | rt/24 h        | 50                          | 44/66                         |
| 2     | [Ru]- <b>I</b>  | reflux/5 h     | 36                          | 41/59                         |
| 3     | [Ru]- <b>I</b>  | $\mu$ W/15 min | 47                          | 24/76                         |
| 4     | [Ru]- <b>II</b> | rt/24 h        | 95                          | 97/3                          |
| 5     | [Ru]- <b>II</b> | reflux/5 h     | 96                          | >99/traces                    |
| 6b    | [Ru]- <b>II</b> | reflux/5 h     | 90                          | 95/5                          |
| 7     | [Ru]- <b>II</b> | $\mu$ W/15 min | 100 (83) <sup>d</sup>       | 100/0                         |
| 8b    | [Ru]- <b>II</b> | $\mu$ W/15 min | 96                          | 97/3                          |

<sup>a</sup> Reagents and conditions: (i) *tert*-butyl acrylate, [Ru] 5 mol %, CH<sub>2</sub>Cl<sub>2</sub>. <sup>b</sup> 1 equiv of *tert*-butyl acrylate. <sup>c</sup> Measured by <sup>1</sup>H NMR of the crude mixture <sup>d</sup> Isolated yield (SiO<sub>2</sub> column chromatography, eluent : hexane/ethyl acetate = 80/20).

## EXPERIMENTAL PART

### 1. General information

NMR spectra ( $^1\text{H}$  and  $^{13}\text{C}$ ) were recorded on a JEOL JNM-AL300 ( $^1\text{H}$ :300 MHz;  $^{13}\text{C}$ : 75.5 MHz) or a Varian UNITY INOVA 400NB ( $^1\text{H}$ :400 MHz;  $^{13}\text{C}$ :100 MHz) spectrometer and the chemical shift values were expressed in parts per million downfield from tetramethylsilane (TMS) as an internal standard. All coupling constants ( $J$  values) were reported in Hertz (Hz). Melting points were taken on a micro hot-stage apparatus (Yanagimoto). Mass spectra (MS) were obtained by electron impact (EI, CI) ionization methods on JEOL GCmate MS-BU20. Elemental analyses were done on a Perkin-Elmer Series CHNS/O Analyzer 2400. Specific Rotations were recorded on a Horiba High-speed Accurate Polarimeter SEPA-300 with a sodium lamp and are reported as follows:  $[\alpha]_{\text{D}}^{\text{T}}$  (c g/100 mL, solvent). Microwave experiments were carried out with a CEM Discover oven. Preparative HPLC was carried out using a Waters 600E system equipped with a UV detector. Organic extracts were dried over sodium sulfate ( $\text{Na}_2\text{SO}_4$ ), filtered, and concentrated using a rotary evaporator at  $<40\text{ }^\circ\text{C}$  bath temperature. Solids and non volatile oils were vacuum dried at  $<2\text{ mmHg}$ .

### 2. Materials

Commercially available chemicals were obtained from Waco Pure Chemical Industries, Ltd. (Osaka, Japan), Nacalai Tesque, Inc. (Kyoto, Japan), Aldrich Chemical Co., Inc. (Milwaukee, WI), Tokyo Kasei Kogyo Co., Ltd. (Tokyo, Japan), Kishida Chemical Co., Ltd. (Osaka, Japan), and used without further purification. Column chromatography was carried on Merck 107734 silica gel 60 (70-230 mesh). Analytical thin layer chromatography (TLC) was performed using Merck 105715 silica gel 60  $\text{F}_{254}$  precoated plates (0.25 mm thickness) and compounds were visualized by UV illumination (254 nm) and by heating after spraying ca. 0.7% ethanolic solution of ninhydrin.

### 3. Total synthesis of (-)-Negamycin

#### 3-1. (*R*)-*tert*-Butyl 5-allyl-2,2-dimethyloxazolidine-3-carboxylate (4)

To a solution of *B*-allyl-diisopinocampheylborane [(+)-Ipc<sub>2</sub>B(allyl)] (4 mL of 1M solution in pentane, 4 mmol) dissolved in Et<sub>2</sub>O (4 mL) was added at  $-100\text{ }^\circ\text{C}$  a solution of N-Boc-2-aminoacetaldehyde (636 mg, 4 mmol) dissolved in Et<sub>2</sub>O cooled to  $-78\text{ }^\circ\text{C}$  (4 mL). The reaction mixture was stirred for 2 hours at  $-100\text{ }^\circ\text{C}$  and MeOH (600  $\mu\text{L}$ ), 1N NaOH (4.8 mL) and H<sub>2</sub>O<sub>2</sub> (450  $\mu\text{L}$ ) were added. Oxidation was completed by refluxing 3h before addition of water for extraction. The aqueous phase was washed twice with EtOAc, the organic layers were combined and dried over Na<sub>2</sub>SO<sub>4</sub>. After filtration and evaporation of the solvent under reduced pressure, the residue was dissolved in acetone and both 2,2-

dimethoxypropane and boron trifluoride, ethyl ether complex were added at room temperature. The reaction mixture was stirred under reflux at 66 °C for over night. The solution was poured into sat. NaHCO<sub>3</sub> aq., and acetone was removed under reduced pressure. The resulting residue was extracted with AcOEt and washed consecutively with sat. NaHCO<sub>3</sub> aq., brine, and dried over Na<sub>2</sub>SO<sub>4</sub>. The solvent was removed under reduced pressure, the residue was applied to silica-gel column chromatography (CHCl<sub>3</sub>:MeOH=15:1) to yield the desired compound **4** with 90% yield as colourless oil. <sup>1</sup>H NMR (300 MHz, CDCl<sub>3</sub>) δ 7.89-7.74 (m, 1H), 5.16-5.08 (m, 2H), 4.17-4.05 (m, 1H), 3.55-3.73 (m, 1H), 3.05-3.15 (m, 1H), 2.23-2.50 (m, 2H), 1.46 (br s, 15H); [α]<sub>D</sub><sup>24.9</sup> -46.8 ° (c 1.00, CHCl<sub>3</sub>); HRMS (EI+) calculated for C<sub>13</sub>H<sub>23</sub>NO<sub>35</sub> (M<sup>+</sup>) 241.3270, found 241.3300.

### 3-7. (*S*)-*tert*-Butyl 5-[(*E*)-3-(*tert*-butoxycarbonyl)allyl] -2,2-dimethyloxazolidine-3 –carboxylate (**3**).

In a microwave reactor, to a solution of Grubbs catalyst second generation (10,5 mg, 0.0125 mmol) dissolved in CH<sub>2</sub>Cl<sub>2</sub> (250 μL) was added dropwise a mixture of **4** (60 mg, 0.25 mmol) and *tert*-butyl acrylate (108 μL, 1.25 mmol) in CH<sub>2</sub>Cl<sub>2</sub> (250 μL). The reaction mixture was irradiated for 15 minutes (Temperature set to 40 °C and automatically controlled by the oven). The residue was then applied to silica-gel column chromatography (hexane:AcOEt=10:1) to yield the desired compound **3** as light-yellow oil

<sup>1</sup>H NMR (400 MHz, CDCl<sub>3</sub>) δ 6.82 (td, *J* = 7.0, 16.0 Hz, 1H), 5.85 (d, *J* = 15.7 Hz, 1H), 4.19-4.14 (m, 1H), 3.73-3.65 (m, 1H), 3.13-3.04 (m, 1H), 2.55-2.42 (m, 2H), 1.57 (br s, 3H), 1.54 (br s, 3H), 1.48 (s, 18H); <sup>13</sup>C NMR (101 MHz, CDCl<sub>3</sub>) δ 165.5, 152.2, 141.9, 125.8, 93.7, 93.3, 80.4, 79.6, 72.2, 72.0, 50.5, 35.6, 28.4, 28.1, 27.2, 26.2, 25.3, 24.3; [α]<sub>D</sub><sup>24.6</sup> -26.2 ° (c 1.06, CHCl<sub>3</sub>); HRMS (EI+) calculated for C<sub>18</sub>H<sub>31</sub>N<sub>1</sub>O<sub>5</sub> (M<sup>+</sup>) 341.2202, found 341.2200.

### 3-8. (*R*)-*tert*-Butyl-5-[(*R*)-3-(*tert*-butoxycarbonyl)-2-[*N*-benzyl-*N*-(2-methoxy-7,7-dimethylbicyclo[2,2,1]heptan-1-yl)methyl]amino]propyl]-2,2-dimethyloxazolidine-3-carboxylate (**8**).

A 2.6M solution of *n*-butyllithium in hexane (112 μL) was added to a solution of **7** (80.0 mg, 0.298 mmol) in tetrahydrofuran (1.0 mL) and the mixture was stirred at -50 °C. After passing 1 hour, a solution of **3** (50 mg, 0.146 mmol) in tetrahydrofuran (0.7 mL) was added dropwise to the reaction mixture, which was stirred at -40 °C for another 2 hours. After quenching the reaction by adding a saturated solution of sodium sulfate, the mixture was extracted with chloroform. The organic layer was washed with a saturated solution of sodium chloride, dried over anhydrous sodium sulfate, and condensed *in vacuo*. The residue was purified by silica gel column chromatography (n-hexane : ethyl acetate = 10:1) to afford compound **8** (72.1 mg, 80.4%) accompanying with the recovered starting material **3** (8.3 mg, 16.6 %).

$^1\text{H}$  NMR (400 MHz,  $\text{CDCl}_3$ )  $\delta$  7.29-7.26 (m, 4H), 7.22-7.18 (m, 1H), 4.31 (br s, 1H), 3.83 (d,  $J$  = 14 Hz, 1H), 3.67-3.63, 3.57-3.53 (m, total 1H), 3.47 (dd,  $J$  = 7.2, 2.8 Hz, 1H), 3.32-3.27 (m, 1H), 3.25, 3.21 (s, total 1H), 3.18 (s, 3H), 3.01-2.93 (m, 2H), 2.81-2.70 (m, 2H), 2.18 (d,  $J$  = 13.6 Hz, 1H), 2.12-2.03 (m, 1H), 1.79-1.73 (m, 2H), 1.65-1.26 (m, 12H), 1.47 (s, 9H), 1.43 (s, 9H), 0.91 (s, 3H), 0.63 (s, 3H);  $^{13}\text{C}$  NMR (101 MHz,  $\text{CDCl}_3$ )  $\delta$  172.4, 152.4, 140.7, 129.2, 128.0, 126.6, 93.2, 92.8, 85.0, 80.2, 79.8, 79.2, 70.7, 70.1, 54.8, 54.0, 52.6, 51.3, 50.9, 47.7, 45.5, 30.8, 28.5, 28.1, 27.4, 27.2, 26.4, 25.3, 24.4, 20.6, 20.4;  $[\alpha]_{\text{D}}^{24.6}$   $-14.0^\circ$  (c 1.01,  $\text{CHCl}_3$ ); HRMS (EI+) calculated for  $\text{C}_{36}\text{H}_{58}\text{N}_2\text{O}_6$  ( $\text{M}^+$ ) 614.4294, found 614.4286.

**3-9. (*R*)-*tert*-Butyl-5-{(*R*)-3-(*tert*-butoxycarbonyl)-2-aminopropyl}-2,2-dimethyl-oxazolidine-3-carboxylate (9).**

Under Ar atmosphere, the solution of *tert*-butyl ester **8** (200.00 mg, 0.43 mmol) in anhydrous  $\text{CH}_2\text{Cl}_2$  (3 mL) was added to NIS (293.00 mg, 1.30 mmol) light shielding at room temperature. The reaction mixture was stirred at room temperature for 2 h. The solution was poured into sat.  $\text{NaHCO}_3$  aq., and the organic phase was extracted with  $\text{CHCl}_3$ , wash with 10 %  $\text{Na}_2\text{S}_2\text{O}_3$  aq. and brine, and dried over  $\text{Na}_2\text{SO}_4$ . The solvent was removed under reduced pressure, the residue was applied to silica-gel column chromatography (hexane:AcOEt=20:1) to yield the desired compound **9** as light-yellow oil (80.4 mg, 71%).  $^1\text{H}$  NMR (400 MHz,  $\text{CDCl}_3$ )  $\delta$  4.25-4.18 (m, 1H), 3.73-3.65 (m, 1H), 3.40-3.33 (m, 1H), 3.08-3.06 (m, 1H), 2.44 (dd,  $J$  = 4.0, 15.6 Hz, 1H), 2.24 (dd,  $J$  = 8.8, 15.6 Hz, 1H), 1.74 (br s, 2H), 1.69 (dd,  $J$  = 4.6, 7.9 Hz, 1H), 1.64-1.61 (m, 1H), 1.57 (br s, 3H), 1.53 (br s, 3H), 1.47 (s, 9H), 1.46 (s, 9H);  $^{13}\text{C}$  NMR (101 MHz,  $\text{CDCl}_3$ )  $\delta$  171.5, 152.2, 93.4, 92.9, 80.7, 80.0, 79.4, 71.2, 70.9, 51.1, 45.8, 44.1, 40.4, 28.4, 28.1, 27.3, 26.3, 25.2, 24.3;  $[\alpha]_{\text{D}}^{25.3}$   $-11.8^\circ$  (c 1.05,  $\text{CHCl}_3$ ); HRMS (EI+) calculated for  $\text{C}_{18}\text{H}_{34}\text{N}_2\text{O}_5$  ( $\text{M}^+$ ) 358.2467, found 358.2474.

**3-10. (*R*)-*tert*-Butyl-5-{(*R*)-3-(*tert*-butoxycarbonyl)-2-*tert*-butoxycarbonyl-aminopropyl}-2,2-dimethyl oxazolidine-3-carboxylate (11).**

To solution of amine **9** (82.40 mg, 0.23 mmol) in THF (2.3 mL) was added to  $(\text{Boc})_2\text{O}$  (64.2 mg, 0.29 mmol) and  $\text{Et}_3\text{N}$  (48.00  $\mu\text{L}$ , 0.35 mmol) dropwise at  $0^\circ\text{C}$ . The reaction mixture was stirred at room temperature for 5 h. The solvent was removed under reduced pressure. The resulting residue was extracted with AcOEt and washed consecutively with 10% citric acid aq., sat.  $\text{NaHCO}_3$  aq., brine, and dried over  $\text{Na}_2\text{SO}_4$ . The solvent was removed under reduced pressure, the residue was applied to silica-gel column chromatography ( $\text{CHCl}_3$ ) to yield the desired compound **11** as light-yellow oil (105.2 mg, 99%).  $^1\text{H}$  NMR (400 MHz,  $\text{CDCl}_3$ )  $\delta$  5.23 (br s, 1H), 4.17-4.10 (m, 1H), 4.08-3.92 (m, 1H), 3.78-3.58 (m, 1H), 3.04 (t,  $J$  = 9.0 Hz, 1H), 2.50 (d,  $J$  = 5.7 Hz, 2H), 1.92-1.69 (m, 2H), 1.56 (s, 3H), 1.52 (s, 3H), 1.47 (s, 9H), 1.45 (s, 9H), 1.44 (s, 9H);  $^{13}\text{C}$  NMR (101 MHz,  $\text{CDCl}_3$ )  $\delta$  170.9, 155.1, 151.8, 93.3, 93.0,

81.0, 80.0, 79.4, 79.2, 71.6, 71.0, 51.0, 45.7, 40.3, 37.6, 28.4, 28.4, 28.1, 27.3, 26.2, 25.1, 24.2;  $[\alpha]_D^{24.2}$  -14.1° (c 1.15, CHCl<sub>3</sub>); HRMS (CI+) calculated for C<sub>23</sub>H<sub>43</sub>N<sub>2</sub>O<sub>7</sub> (M<sup>+</sup>+H) 459.3070, found 459.3073.

**3-11. (*R*)-4-((*R*)-3-(*tert*-Butoxycarbonyl)-2,2-dimethyloxazolidin-5-yl)-3-(*tert*-butoxycarbonylamino)butanoic acid (2).**

To solution of *tert*-butyl ester **11** (105.2 mg, 0.23 mmol) in 2M KOH in MeOH (4 mL) was irradiated under microwave cavity with an output at 10 W for 15 min at 100 °C. The solution was poured into 10 % citric acid aq. And the organic phase was extracted with AcOEt, wash brine, and dried over Na<sub>2</sub>SO<sub>4</sub>. The solvent was removed under pressure. The resulting light-yellow oil (92.1 mg, 99%) was used for next reaction without purification.

**3-12. (*R*)-*tert*-Butyl-(*R*)-5-[2-(*tert*-butoxycarbonylamino)-3-((*tert*-butoxycarbonyl methyl)methylaminocarbamoyl)propyl]-2,2-dimethyloxazolidine-3-carboxylate (13).**

Under Ar atmosphere, the solution of acid **2** (73.8 mg, 0.183 mmol) and *tert*-butyl-2-(*N*-methylhydrazino)acetate · PTSA **12** (118.2 mg, 0.37 mmol) and HOBt (56.0 mg, 0.37 mmol) in anhydrous CH<sub>2</sub>Cl<sub>2</sub> (2.5 mL) was cooled to 0 °C, and Et<sub>3</sub>N (51 μL, 0.09 mmol) was added dropwise, then EDC · HCl was added. The reaction mixture was stirred for 2 h at room temperature. The solution was poured into 10 % citric acid aq., and the organic phase was extracted with AcOEt, wash with sat. NaHCO<sub>3</sub> aq. brine, and dried over Na<sub>2</sub>SO<sub>4</sub>. The solvent was removed under reduced pressure, the residue was applied to silica-gel column chromatography (CHCl<sub>3</sub>:MeOH=50:1) to yield the desired compound **13** as light-yellow oil (99.6 mg, 99%). <sup>1</sup>H NMR (400 MHz, CDCl<sub>3</sub>) δ 7.93, 7.33 (br s, total 1H), 5.74-5.22 (m, 1H), 4.16-4.09 (m, 1H), 3.99 (br s, 1H), 3.56 (d, J = 5.6 Hz, 2H), 3.06-3.02 (m, 1H), 2.76, 2.73 (s, total 3H), 2.47-2.36 (m, 2H), 1.98 (br s, 1H), 1.71-1.68 (m, 2H), 1.59 (br s, 3H), 1.55 (br s, 3H), 1.48 (s, 9H), 1.47 (s, 9H), 1.43 (s, 9H); <sup>13</sup>C NMR (101 MHz, CDCl<sub>3</sub>) δ 174.5, 170.0, 169.0, 155.2, 152.1, 151.7, 93.4, 93.1, 82.3, 82.1, 79.9, 79.3, 79.1, 78.8, 71.8, 59.2, 58.2, 50.9, 46.6, 44.9, 43.8, 38.5, 37.8, 37.0, 28.34, 28.29, 28.0, 27.2, 26.1, 25.0, 24.2;  $[\alpha]_D^{24.2}$  -5.5° (c 1.07, CHCl<sub>3</sub>); m.p. 135-136 °C; HRMS (CI+) calculated for C<sub>26</sub>H<sub>48</sub>N<sub>4</sub>O<sub>8</sub> (M<sup>+</sup>+H) 544.3472, found 544.3470.

**3-13. 2-[(3*R*,5*R*)-3,6-Diamino-5-hydroxy-hexanoyl]-1-methylhydrazinoacetic acid. [(+)-Negamycin]**

The compound **13** (19.0 mg, 0.04 mmol) was treated with 4M HCl/dioxane (2 mL) at 0 °C. The reaction mixture was stirred at same temperature for 2 h. The solvent was removed under pressure; the remaining crude light-yellow oil was purified by ion exchange chromatography on Amberlite CG50

(NH<sub>4</sub><sup>+</sup> form) or by preparative HPLC. <sup>1</sup>H NMR (400 MHz, D<sub>2</sub>O) δ 3.97-3.89 (m, 1H), 3.55-3.49 (m, 1H), 3.24 (s, 2H), 2.97 (dd, *J* = 13.2, 3.2 Hz, 1H), 2.80 (dd, *J* = 13.2, 9.2 Hz, 1H), 2.48 (s, 3H), 2.39-2.36 (m, 2H), 1.79-1.56 (m, 2H); <sup>13</sup>C NMR (101 MHz, CDCl<sub>3</sub>) δ 176.8, 170.8, 64.3, 60.9, 45.5, 44.3, 43.8, 41.8, 39.3; [α]<sub>D</sub><sup>25.2</sup> +2.4 ° (c 0.36, H<sub>2</sub>O), lit. [α]<sub>D</sub><sup>29.0</sup> +2.5 ° (c 2.00, H<sub>2</sub>O); m.p. 135-136 °C; HRMS (FAB+) calculated for C<sub>9</sub>H<sub>21</sub>N<sub>4</sub>O<sub>4</sub> (M<sup>+</sup>+H) 249.1563, found 249.1559.

### 3.14. *tert*-Butyl 2-(*N*-methylhydrazino)acetate.PTSA (**12**)

At 0 °C, Et<sub>3</sub>N (11.1 mL, 79.31 mmol) and *tert*-butyl 2-bromoacetate (1.0 M solution in CH<sub>2</sub>Cl<sub>2</sub>, 8.4 mL, 56.56 mmol) were added dropwise to a solution of methylhydrazine (3.0 mL, 56.56 mmol) in CH<sub>2</sub>Cl<sub>2</sub> (190 mL). The reaction mixture was then stirred at room temperature overnight. Solvent was removed under reduced pressure and residue is dissolved with an AcOEt/MeOH mixture (15:1), filtrated and the resulting solution was evaporated under reduced pressure. The residue was applied to silica-gel column chromatography (AcOEt/MeOH =15:1) to yield the desired compound as colorless oil (7.5 mg). The pure compound was then dissolved in THF (70.0 mL) and *p*-toluenesulfonique acid (8.864g, 46.60 mmol) was added. The reaction mixture was stirred at this temperature for 30 minutes before filtration. The cake was washed with Et<sub>2</sub>O. The solution was then evaporated under reduced pressure to yield the desired compound **12** as a white powder (10.4 g, 50% for 2 steps) <sup>1</sup>H NMR (400 MHz, CDCl<sub>3</sub>) δ 7.77 (d, *J* = 9.0 Hz, 2H), 7.16 (d, *J* = 9.0 Hz, 2H), 3.73 (s, 2H), 2.90 (s, 3H), 2.36 (s, 3H), 1.43 (s, 9H); <sup>13</sup>C NMR (101 MHz, CDCl<sub>3</sub>) δ 168.1, 141.5, 140.4, 128.9, 126.0, 83.5, 57.7, 43.9, 27.9, 21.3; m.p. 131-133 °C; HRMS (EI+) calculated for C<sub>7</sub>H<sub>16</sub>N<sub>2</sub>O<sub>2</sub> (M<sup>+</sup>) 160.1212, found 160.1214; Anal. Cald for C<sub>7</sub>H<sub>16</sub>N<sub>2</sub>O<sub>2</sub>: C, 50.58; H, 7.28; N, 8.48; found C, 50.48; H, 7.35; N, 8.36.

HQ form

1 stdih  
SAMPLE 5 2007  
date Feb 5 2007  
solvent D2O  
file exp  
ACQUISITION  
sfrq 399.877  
tn H1  
at 3.744  
np 44928  
sw 6000.6  
fb 3000  
bs 16  
tpwr 60  
pw 6.5  
dl 1.256  
tof 600.0  
nt 64  
ct 64  
atlock n  
gain not used  
flags not used  
l1 n  
in n  
dp Y  
hs mh  
DISPLAY  
SP 399.7  
WD 1399.4  
VS 94  
SC 0  
WC 250  
h2mm 5.60  
is 1716.30  
rf1 2243.3  
rfp 1859.4  
th 50  
ins 1.000  
ph

DEC. & VT 399.877  
dfreq H1  
dn H1  
dpwr 30  
dof 0  
dm nnn  
dmf c  
dseq 200  
dres 1.0  
homo n  
PROCESSING  
wtfile  
proc ft  
fn not used  
math f  
werr  
wexp procpilot  
wbs  
wnt

(+)-Negamycin

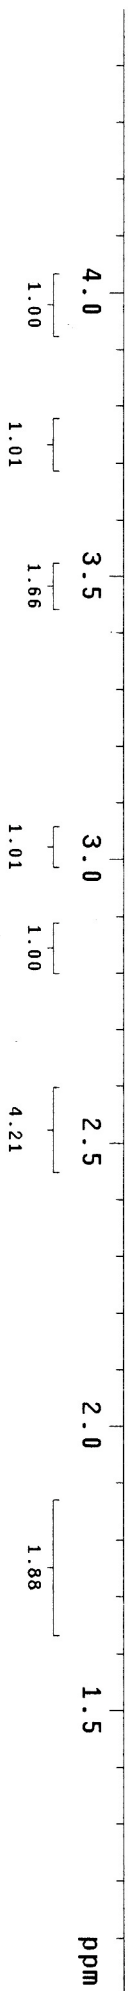



07-1-16-2-178.a1s  
 Wed Jan 17 00:20:14 2007

ILLB  
 MINT  
 TIM  
 INUC  
 MOD  
 IFRQ  
 ISET  
 IFTN  
 INT  
 EQU  
 ANS  
 QTM  
 1  
 NUC  
 BMP  
 VNT  
 REF  
 AIN  
 IH  
 25.3 c  
 CDCL3  
 0.00 ppm  
 0.09 Hz  
 18  
 300.40 MHz  
 130.00 KHz  
 1150.00 Hz  
 32768  
 6013.20 Hz  
 32  
 5.4493 sec  
 1.5510 sec  
 5.00 usec

Compound 13

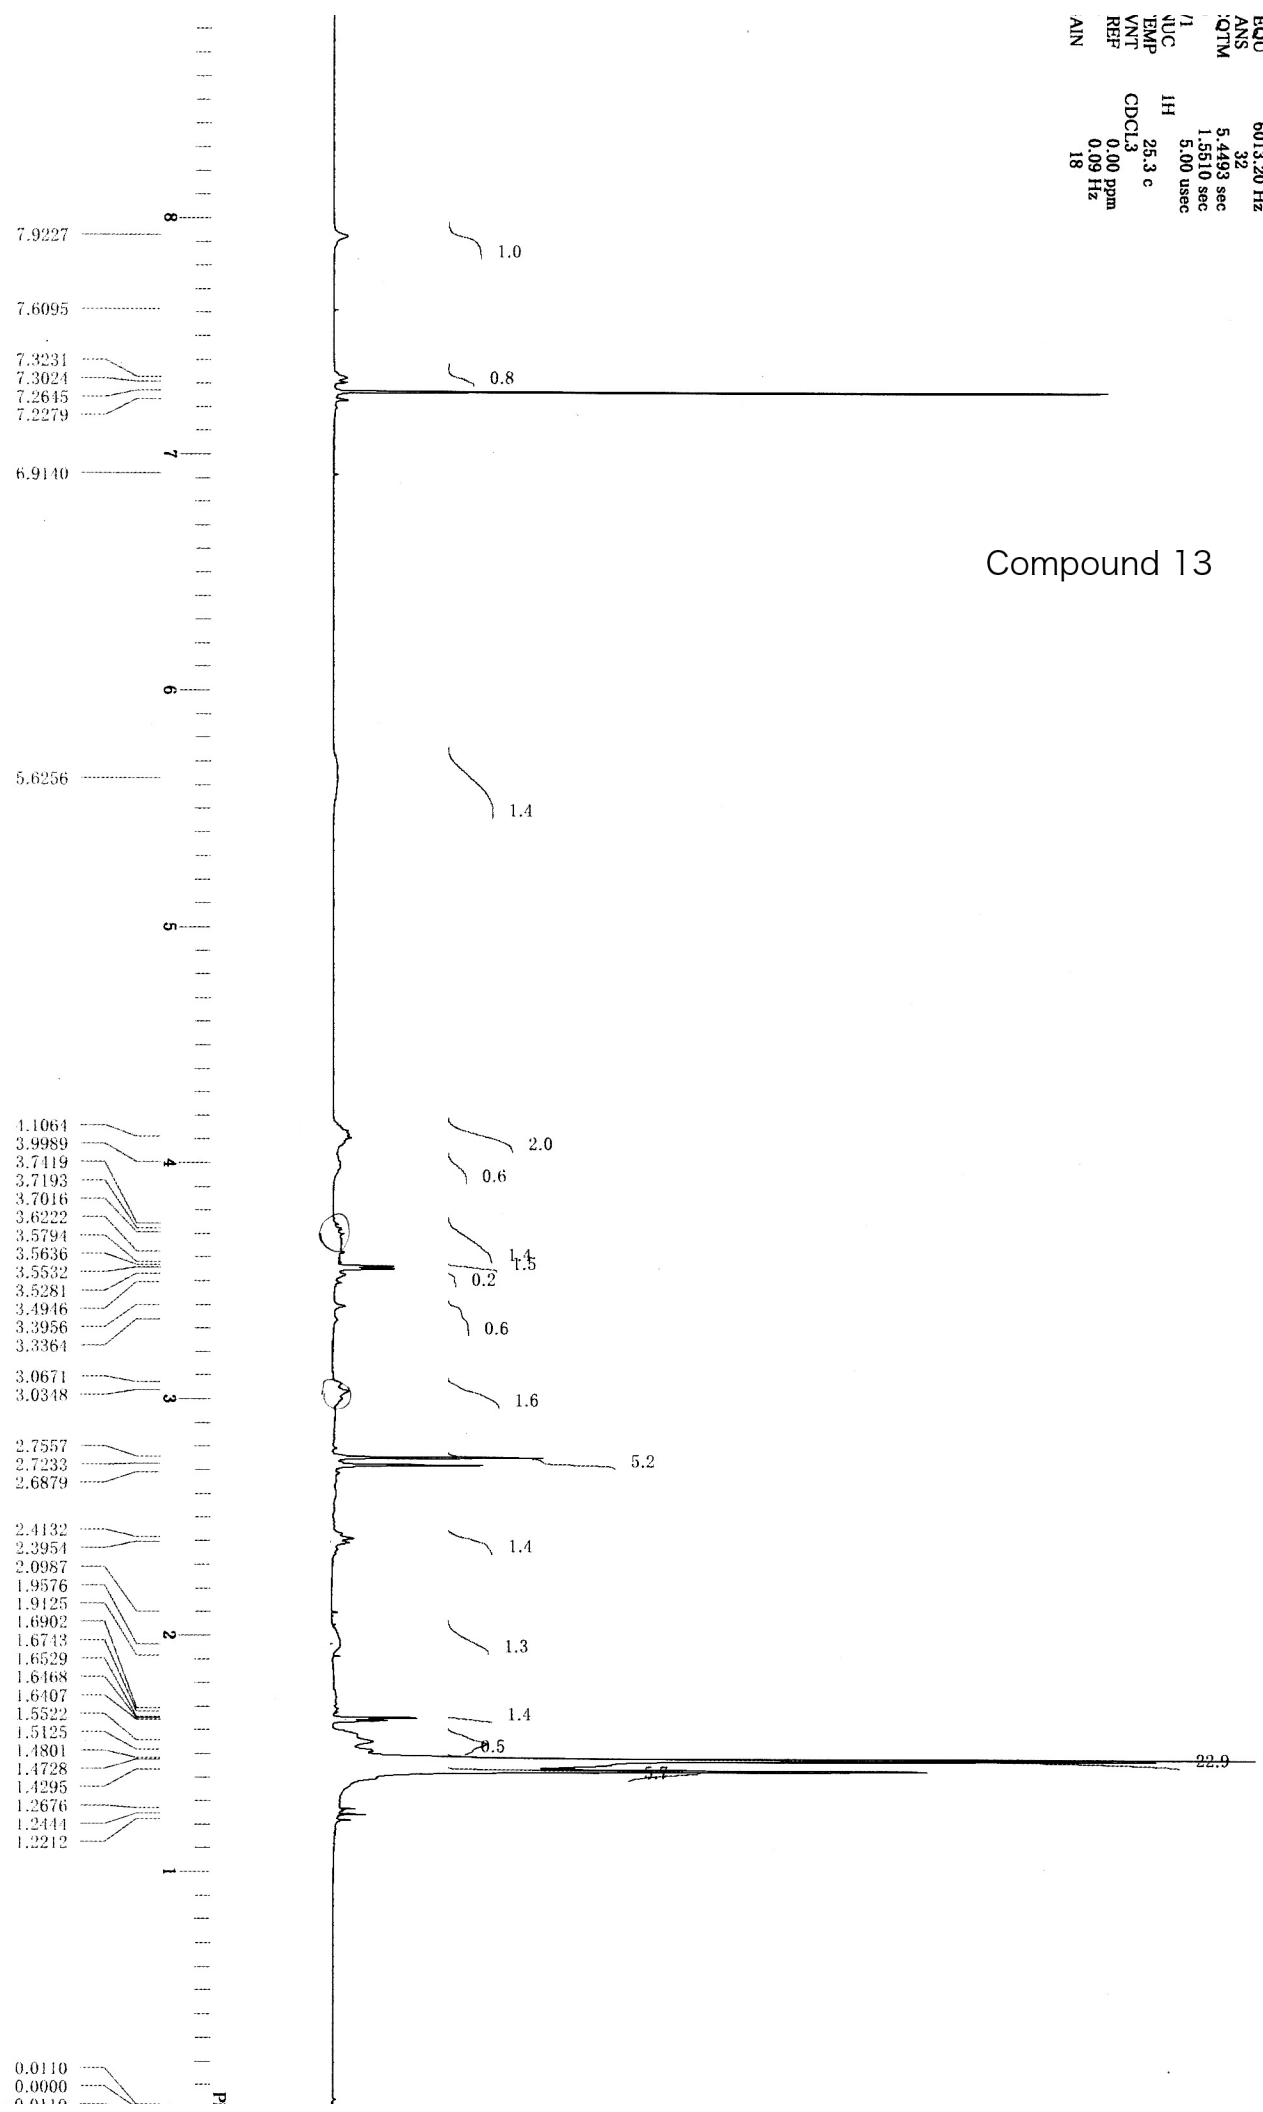

exp6 std13c

SAMPLE DEC. & VT  
date Jan 21 2007 399.876  
solvent CDC13 H1  
file exp H1  
ACQUISITION dof 42  
sfrq 100.559 dm 0  
tn C13 dmm yyy  
at 1.500 dmf W  
np 75008 dres 10000  
sw 25000.0 dres 1.0  
fb 14000 homo n  
bs 4 PROCESSING  
tpwr 54 lb 1.00  
pw 4.5 wffile  
d1 0.500 proc ft  
tof 1400.0 fn not used  
nt 100000 math f  
ct 2800  
alock n werr  
gain not used wexp  
FLAGS not used wbs  
i1 n wnt  
in n  
dp y  
hs nn  
DISPLAY  
sp -1005.6  
wp 21115.1  
vs 411  
sc 0  
wc 250  
h2mm 55.57  
is 500.00  
rf1 9354.0  
rfp 7742.2  
th 6  
ins 100.000  
ai ph

Compound 13

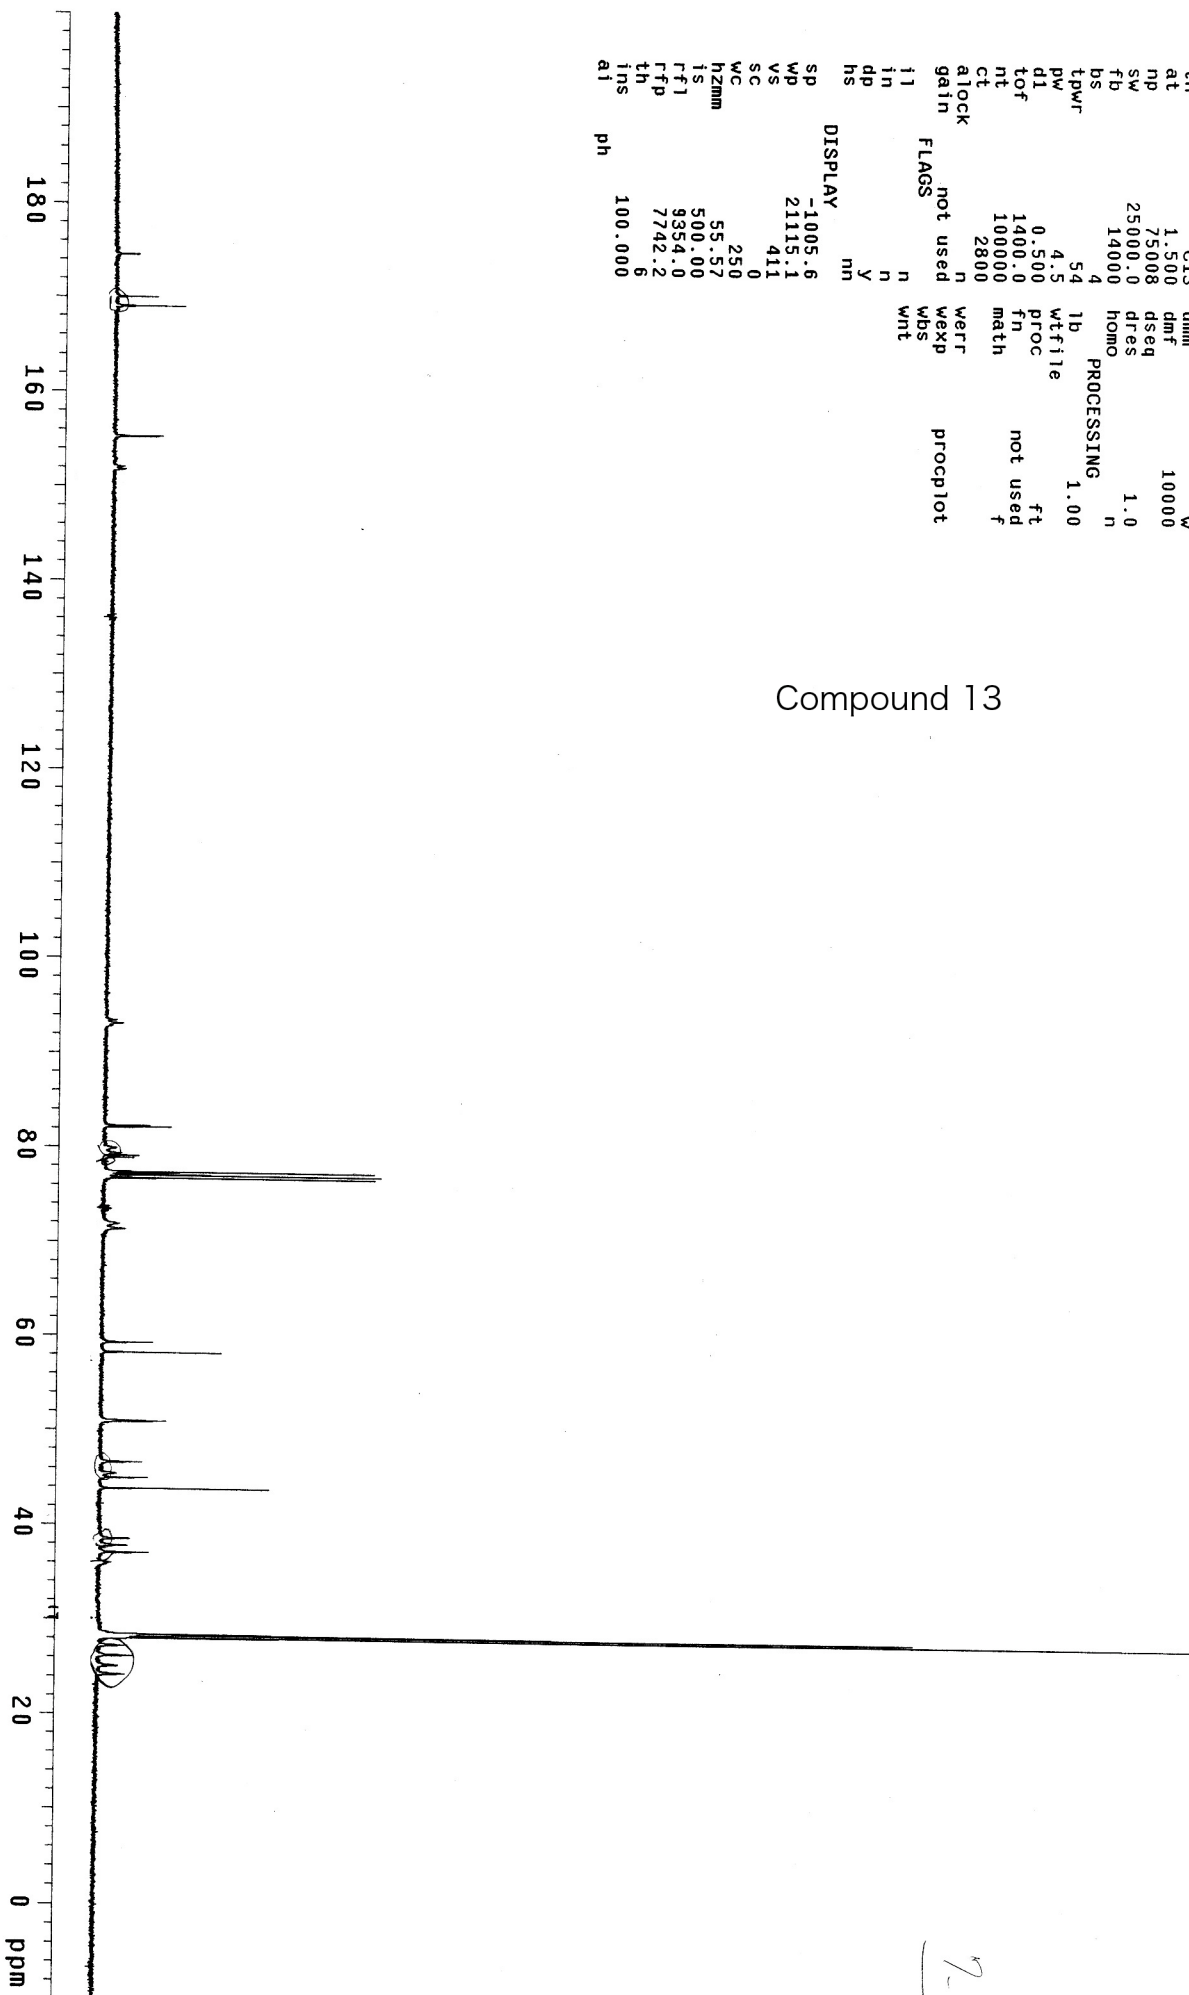

2.8.9

07-01-11-2-176-2.sls  
Thu Jan 11 20:52:17 2007  
300.40 MHz  
130.00 KHz  
1150.00 Hz  
32768  
6013.20 Hz  
16  
5.4493 sec  
1.5510 sec  
5.00 usec  
24.8 c  
0.00 ppm  
0.09 Hz  
21

Compound 12

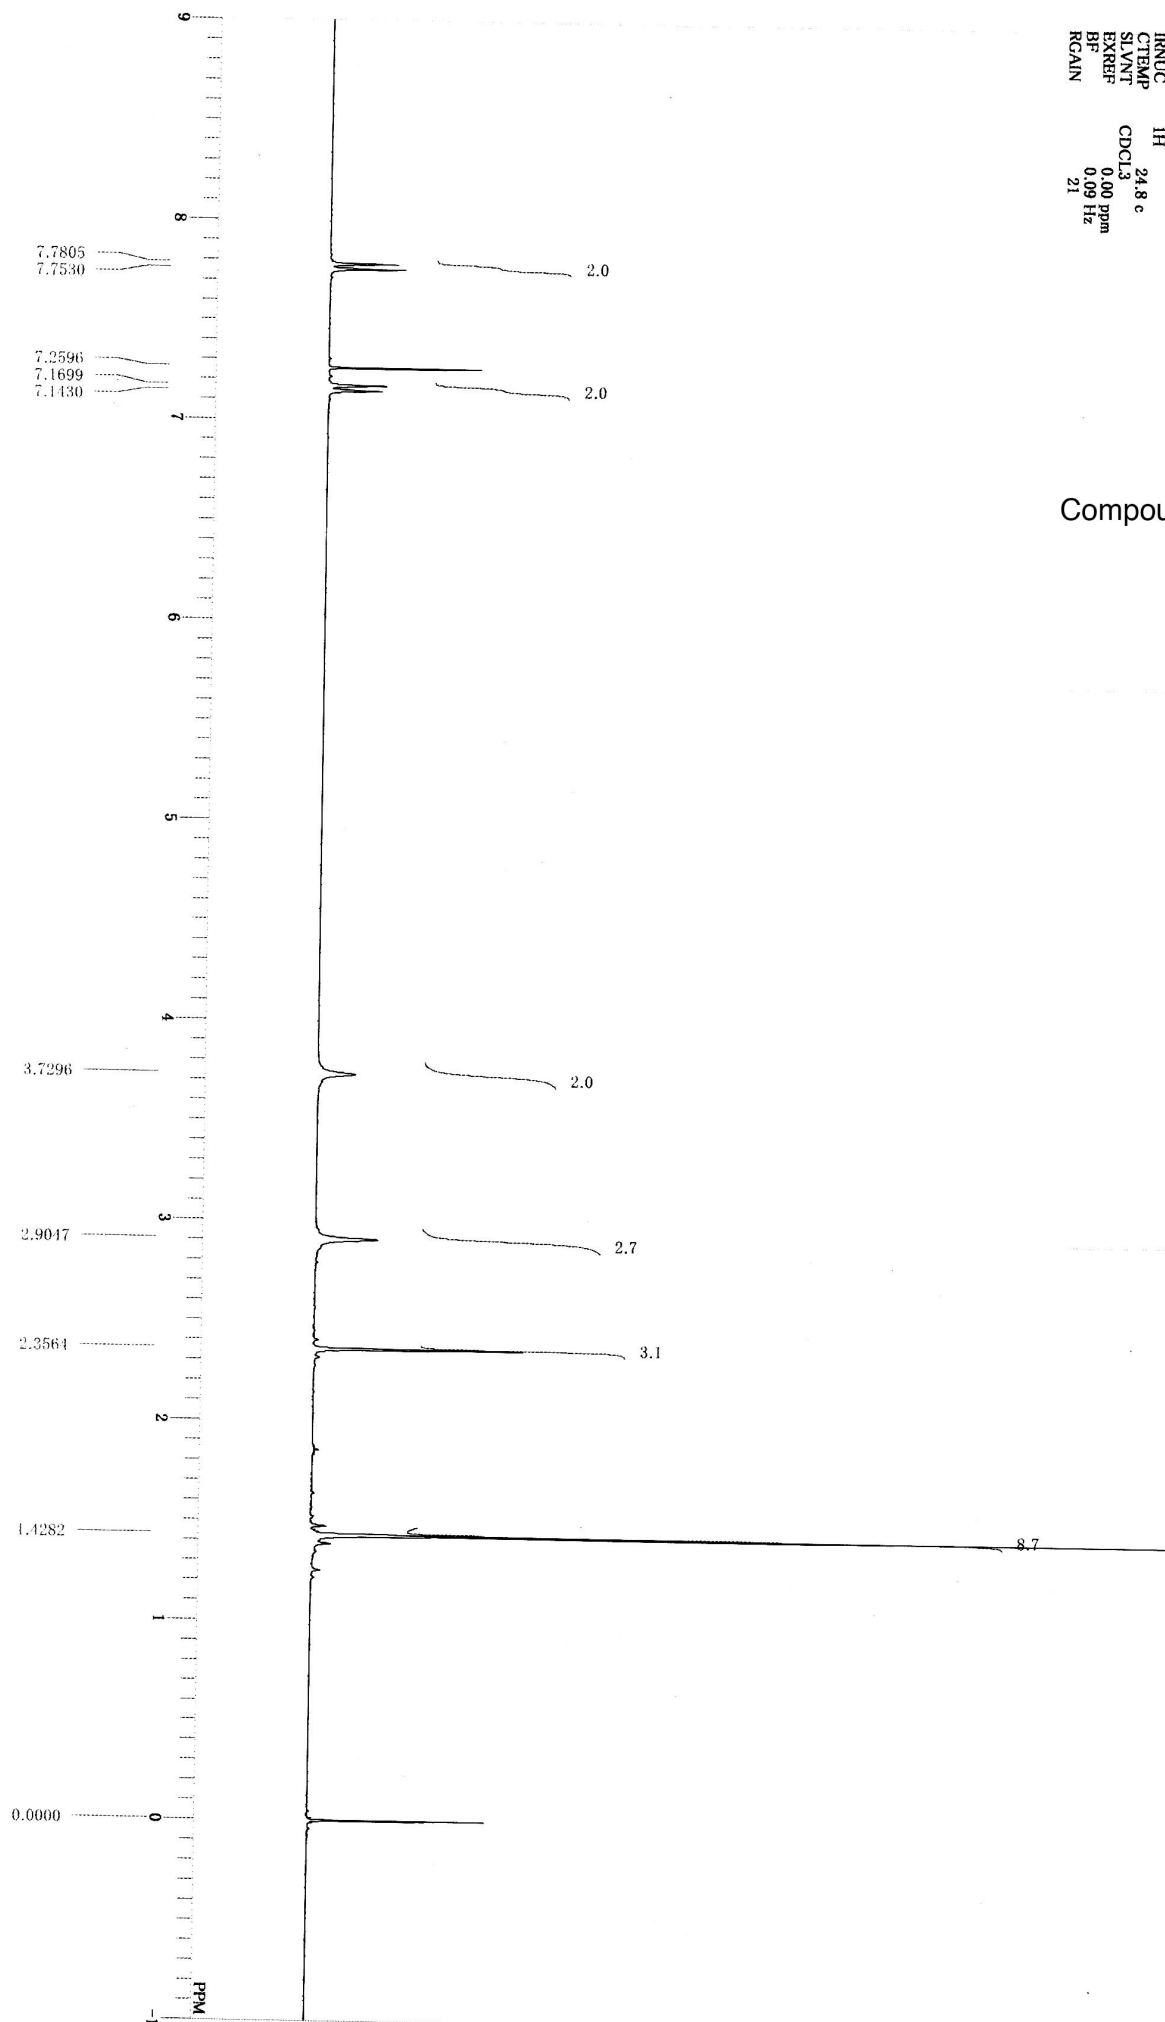

exp6 std13c

|             |             |            |           |         |
|-------------|-------------|------------|-----------|---------|
| date        | Jan 15 2007 | dfreq      | DEC. & VT | 399.876 |
| solvent     | C5D5N       | dn         | H1        | 42      |
| file        |             | dpwr       | H1        | 42      |
| ACQUISITION | exp         | dof        | 0         | 0       |
| sfrq        | 100.559     | dm         | YYY       | W       |
| tn          | C13         | dmm        | 10000     | 10000   |
| at          | 1.500       | dmt        |           |         |
| np          | 75008       | dseq       |           |         |
| sw          | 25000.0     | dres       | 1.0       | n       |
| fb          | 14000       | homo       |           | n       |
| bs          | 4           | PROCESSING | 1.00      |         |
| tpwr        | 54          | lb         |           |         |
| pw          | 4.5         | wffile     |           |         |
| dl          | 0.500       | proc       | ft        |         |
| tof         | 1400.0      | fn         | not used  | f       |
| nt          | 10000       | math       |           |         |
| ct          | 4000        |            |           |         |
| glock       | n           | werr       | procp1ot  |         |
| gain        | not used    | wexp       |           |         |
| flags       |             | wds        |           |         |
| ll          | n           | wnt        |           |         |
| in          | n           |            |           |         |
| dp          | y           |            |           |         |
| hs          | mn          |            |           |         |

DISPLAY

|       |         |
|-------|---------|
| sp    | -1005.6 |
| wp    | 21115.1 |
| vs    | 934     |
| sc    | 0       |
| wc    | 250     |
| hzzmm | 55.57   |
| is    | 500.00  |
| FFI   | 9380.7  |
| FFP   | 7742.2  |
| th    | 10      |
| ins   | 100.000 |
| at    |         |

ph

## Compound 12

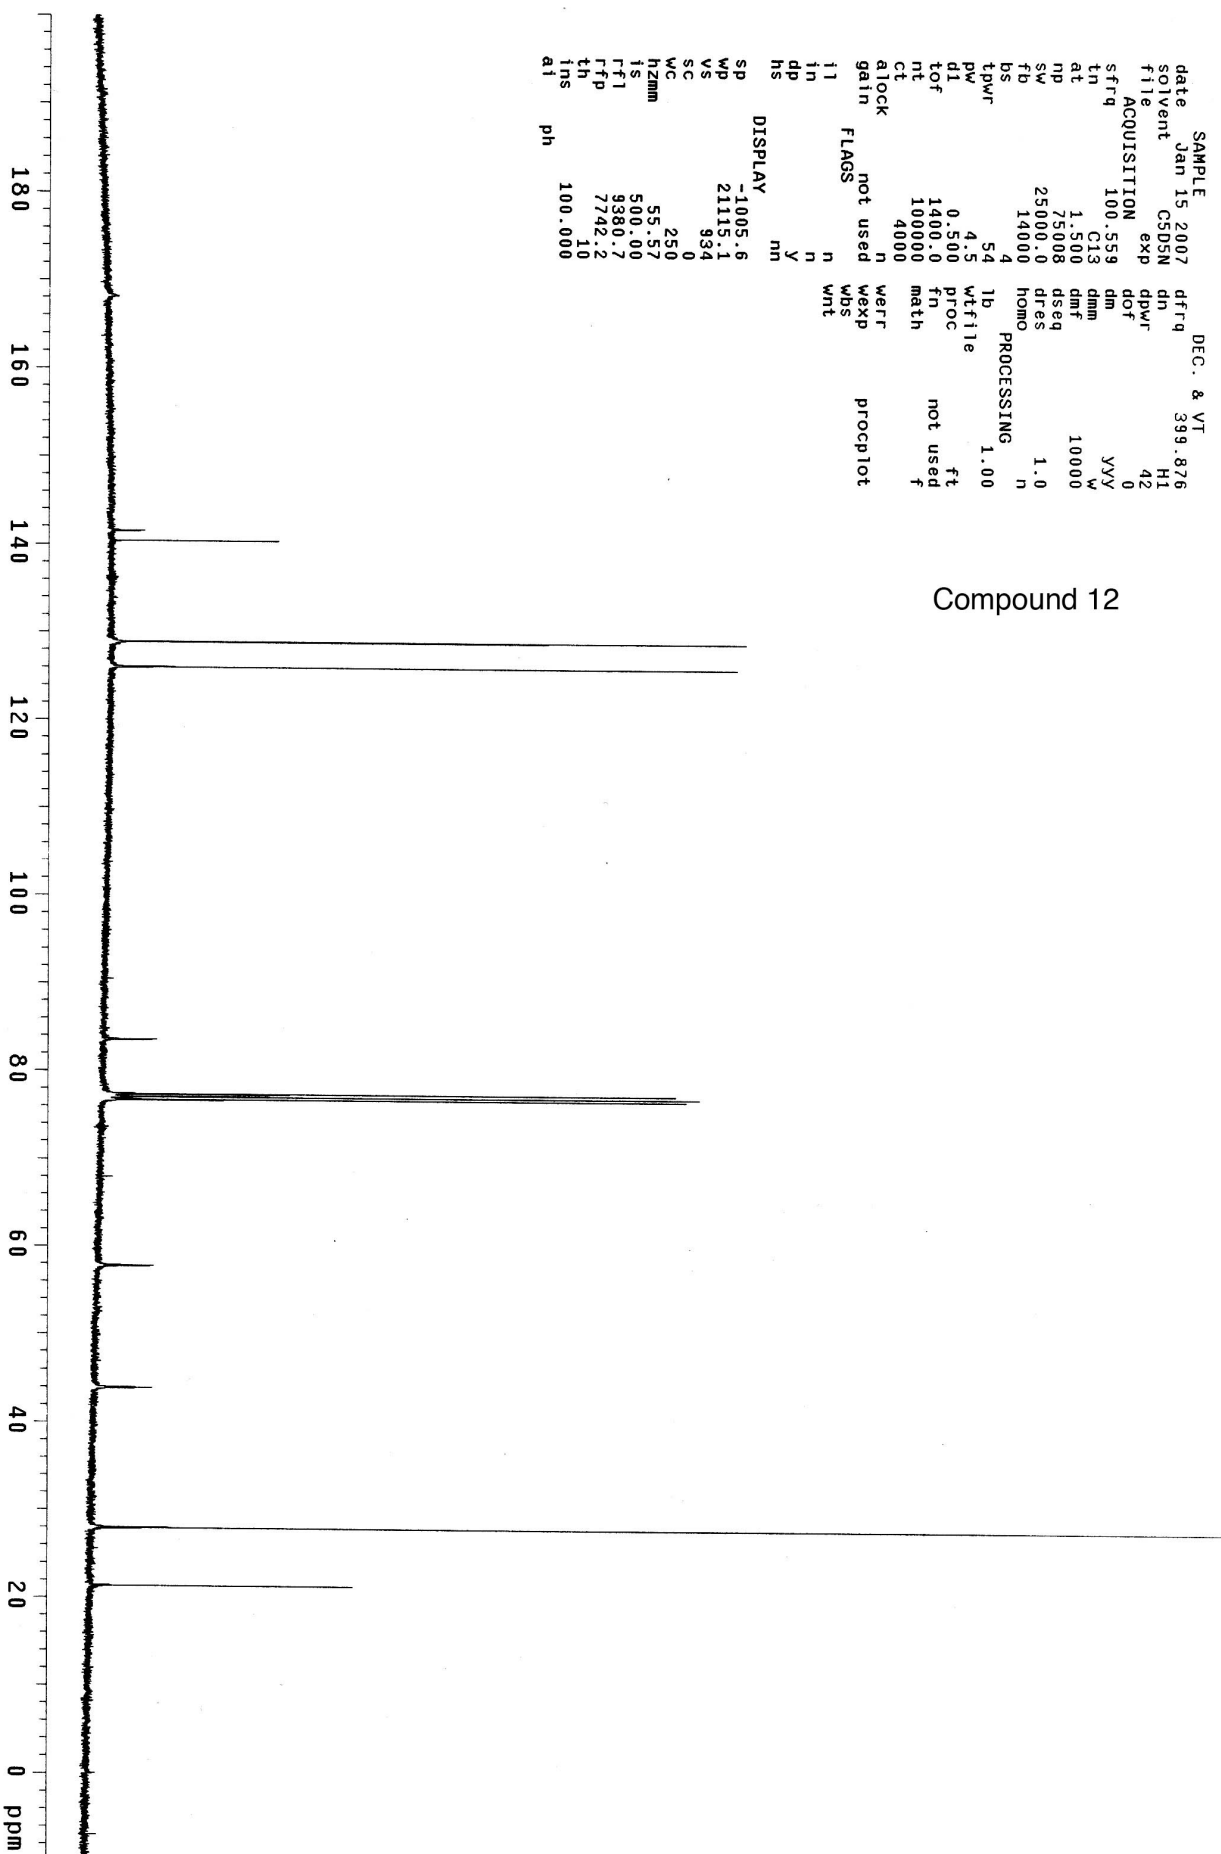

```

2.1.1
expl stidh
SAMPLE Dec 28 2006 DEC. & VT 399.876
solvent CDCl3 dn H1
file exp dpwr 30
ACQUISITION dof 0
sfrq 399.876 H1 dm nm
ln 3.744 H1 dmf C
at 44928 dseq 200
np 6000.6 dres 1.0
sw 3000 homo n
fb 16 PROCESSING
tpwr 60 wffile
pw 6.5 proc ft
dl 1.256 fn not used
tof 600.0 math f
nt 32
ct 32 weff
alock not used wexp
gain not used wbs
flags not used wnt
il n
in n
dp y
hs nm
DISPLAY
sp -200.0
wp 3398.8
vs 40
sc 0
wc 250
hzmm 8.94
is 500.00
rfl 381.3
rffp 0
th 20
ins 1.000
ai ph

```

Compound 11

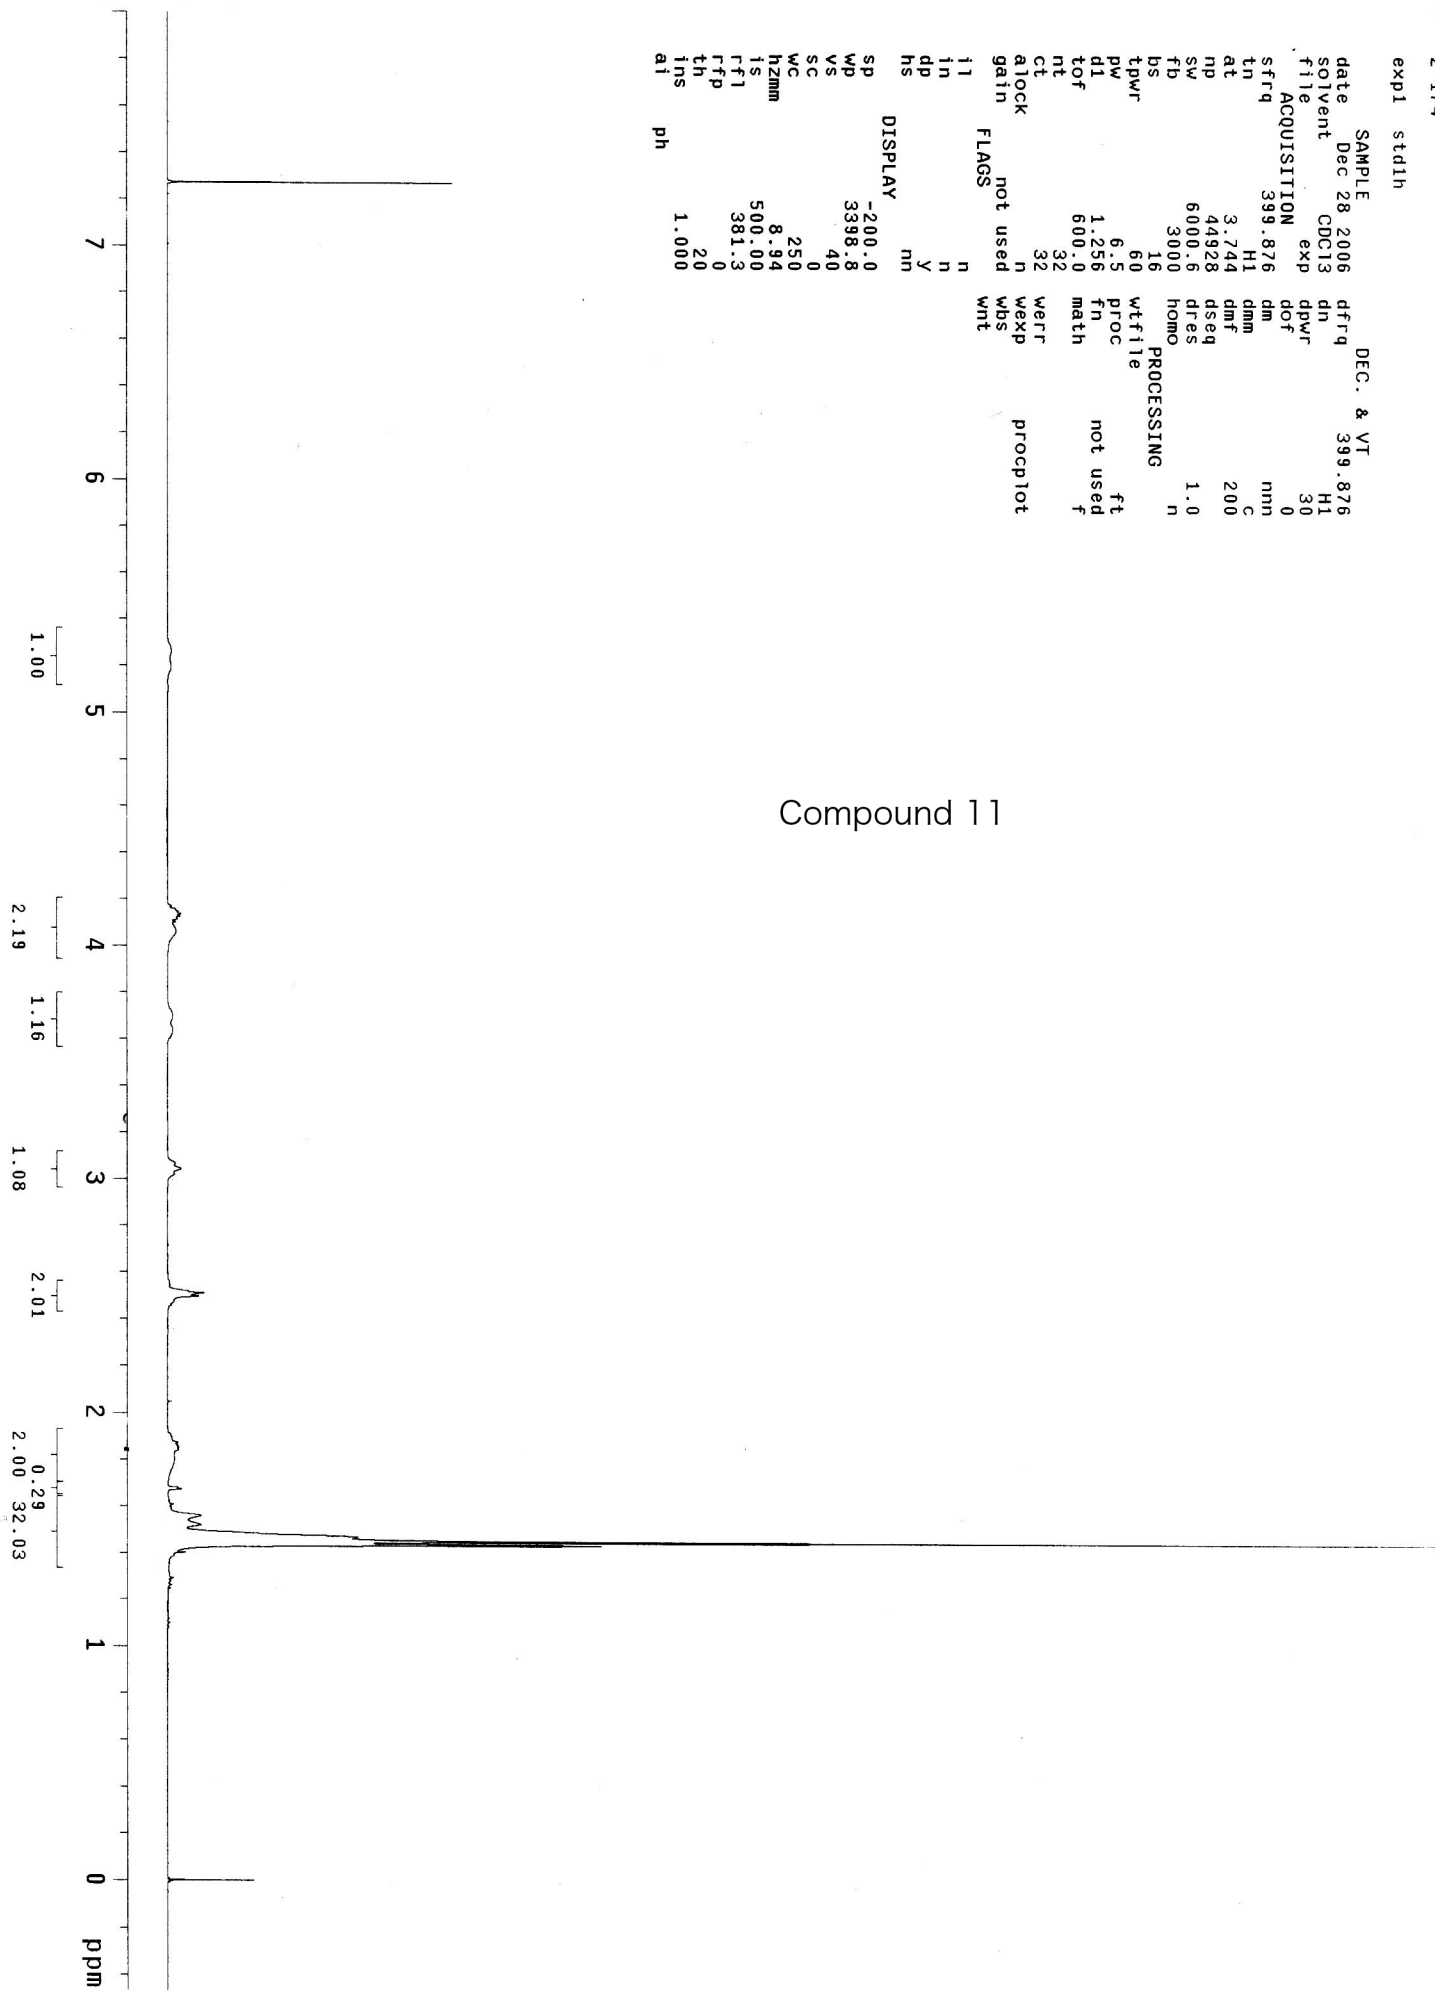

exp6 std13c

SAMPLE Dec 28 2006 dfrc DEC. & VT 399.876  
solvent CDC13 dn H1  
file exp dpwr 42  
ACQUISITION dof 0  
sfrc 100.559 dm YYY  
tn C13 dmm W  
at 1.500 dmf 10000  
np 75008 dseq  
sw 25000.0 dres 1.0  
fb 14000 homo n  
bs 4 PROCESSING 1.00  
tpwr 54 lb wtfile  
pw 4.5 wfile  
di 0.500 proc ft  
tof 1400.0 fn not used  
nt 100000 math not used  
ct 2400  
atlock n Werr  
gain not used Wexp  
FLAGS n Wbs  
in n Wnt  
dp y  
hs nn  
DISPLAY  
sp -1005.6  
wp 21115.1  
vs 870  
sc 0  
wc 250  
hzmm 84.46  
is 500.00  
rf1 9347.9  
rfp 7742.2  
th 40  
ins 100.000  
ai ph

Compound 11

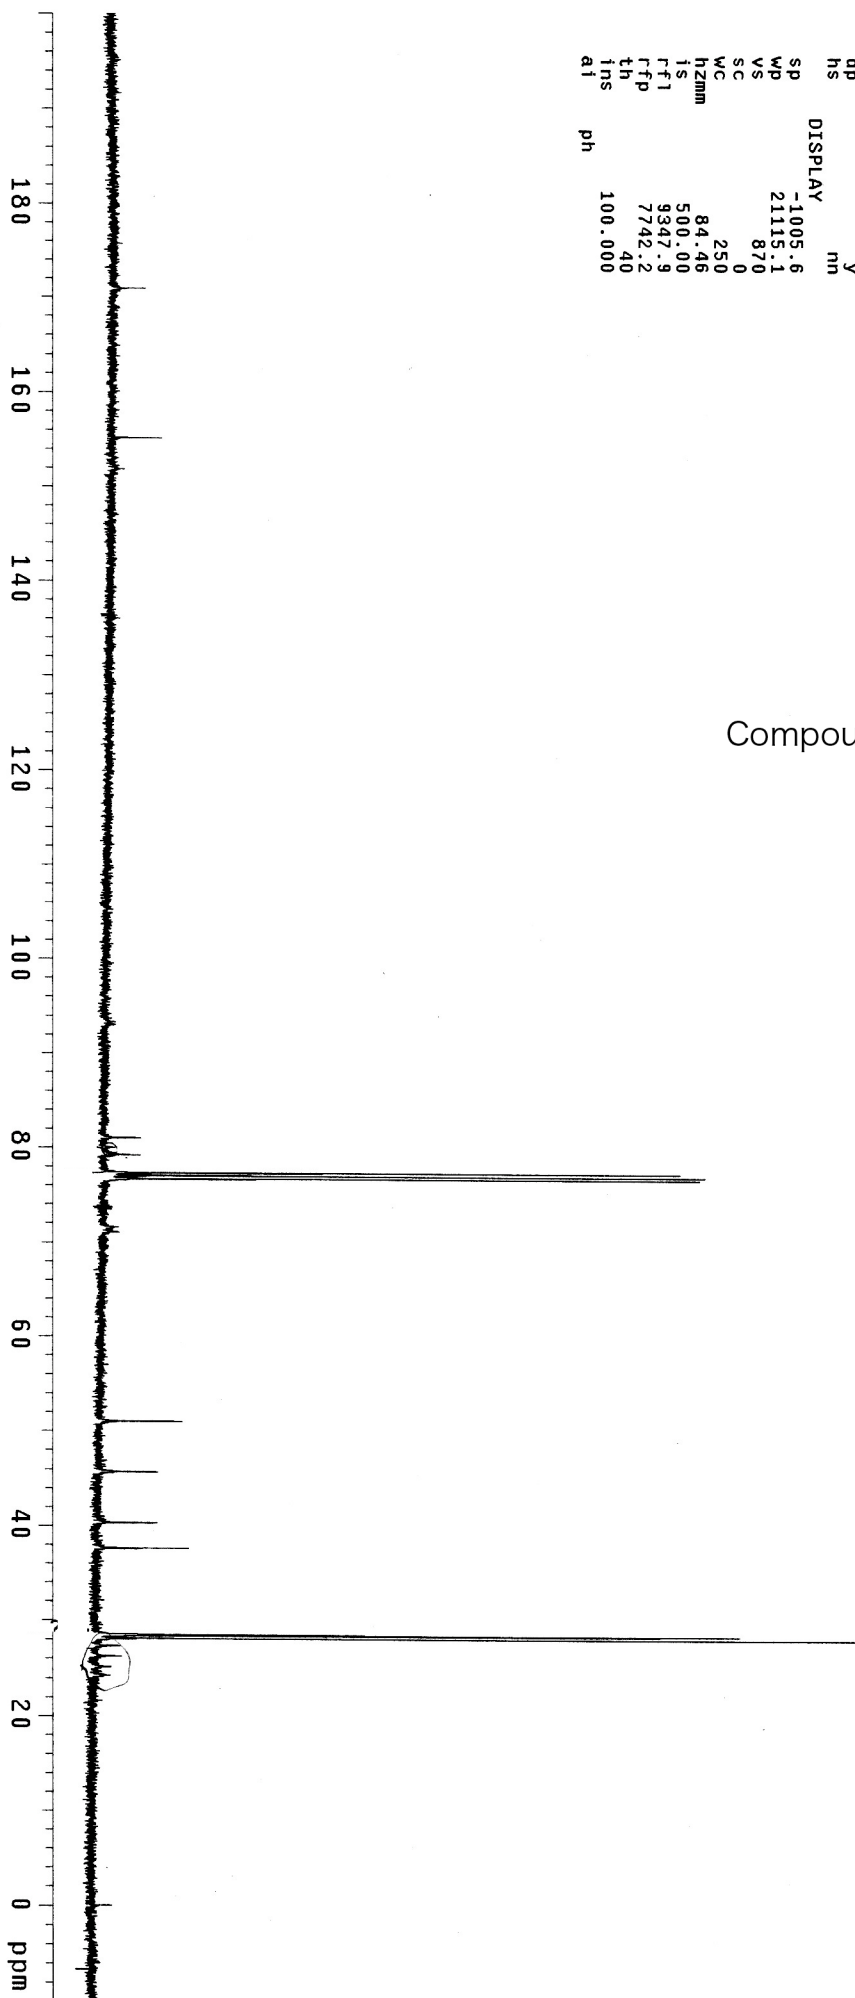

aipei nls  
expi stdih

SAMPLE Dec 26 2006 DEC. & VT 399.876  
date CDC13  
solvent exp  
file ACQUISITION  
sfrq 399.876  
tn H1  
at 3.744  
np 44928  
sw 6000.6  
fb 3000  
bs 16  
tpwr 60  
pw 6.5  
d1 1.256  
tof 600.0  
nt 32  
ct 32  
atlock n  
gain not used  
fl n  
in n  
dp y  
hs nn  
DISPLAY  
sp -200.0  
wp 3798.7  
vs 27  
sc 0  
wc 250  
hzmm 15.20  
fs 500.00  
rf1 377.4  
rfp 0  
th 9  
ins 1.000  
ai ph

Compound 9

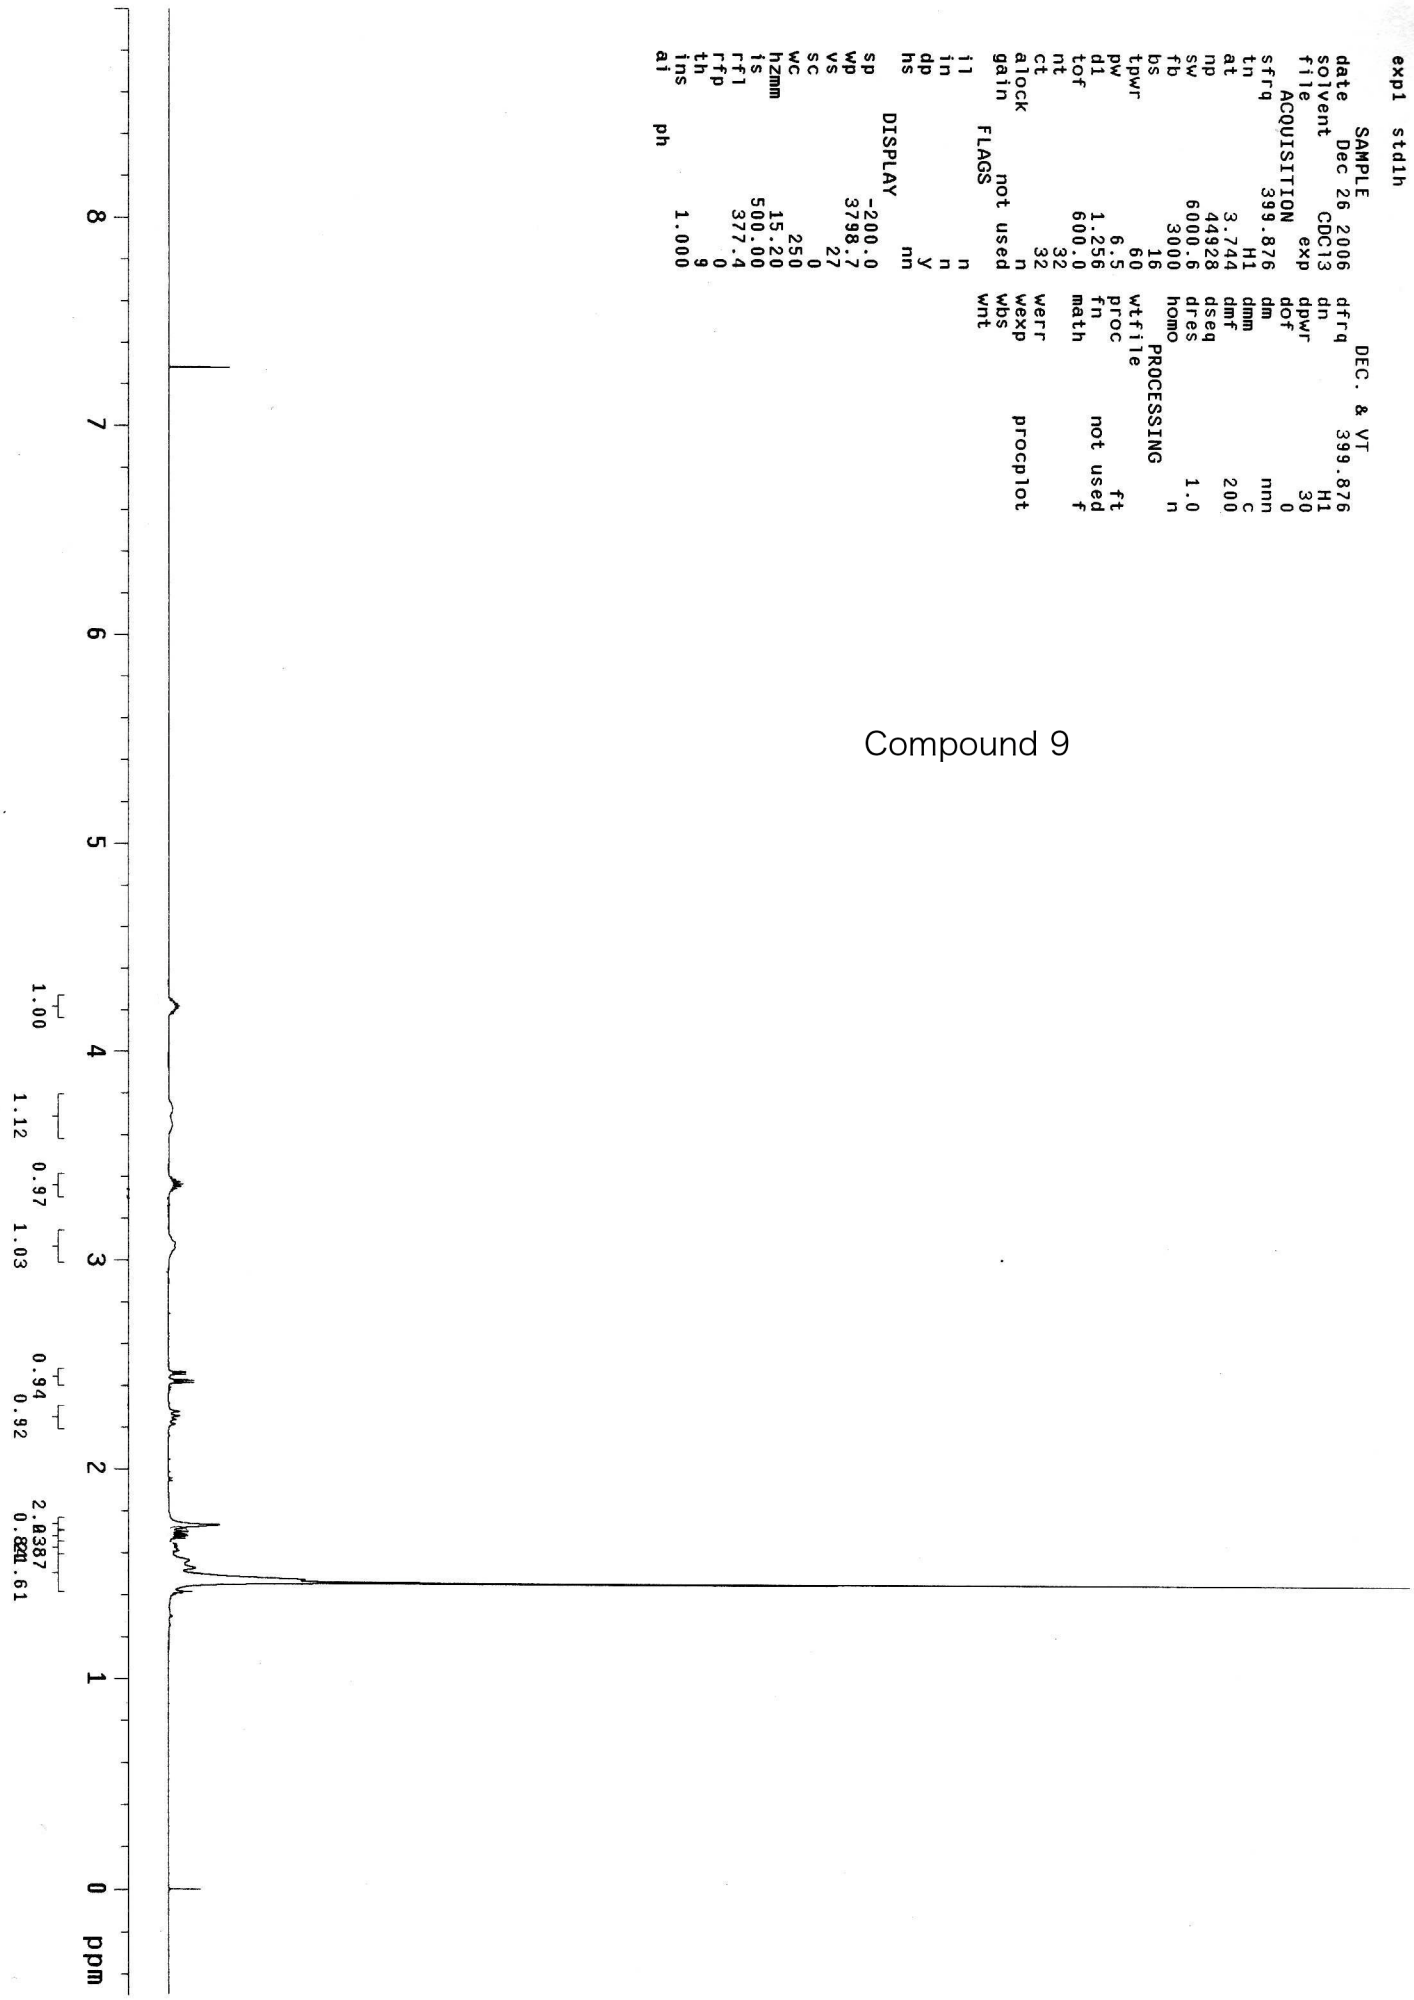

exp6 std13c

```
SAMPLE      Dec 26 2006      dfreq      DEC. & VT      399.876
solvent     CDC13            dn          H1
file        exp            dpwr        42
ACQUISITION 100.559          dof         0
sfrq       C13           dm           VVV
in         1.500          dmm        W
at        75008          dmf        10000
np        25000.0        dseq
sw        14000         dres      1.0
fb        14000         homo      n
bs        4             PROCESSING 1.00
tpwr      54            lb         1b
pw        4.5          wtf file  1.00
dl        1.200        proc      ft
tof       1400.0       fn        not used
nt        1e+06       math      f
ct        2380        verr
atlock    not used    werr
gain      not used    wexp
flags     not used    wds
i1        n           wnt
in        n
dp        Y
hs        nm
DISPLAY
SP        -1005.6
WP        22120.3
VS        981
SC        0
WC        250
h2mm     58.21
IS        500.00
rfl      9349.1
rftp     7742.2
th       27
ins      100.000
at       ph
```

### Compound 9

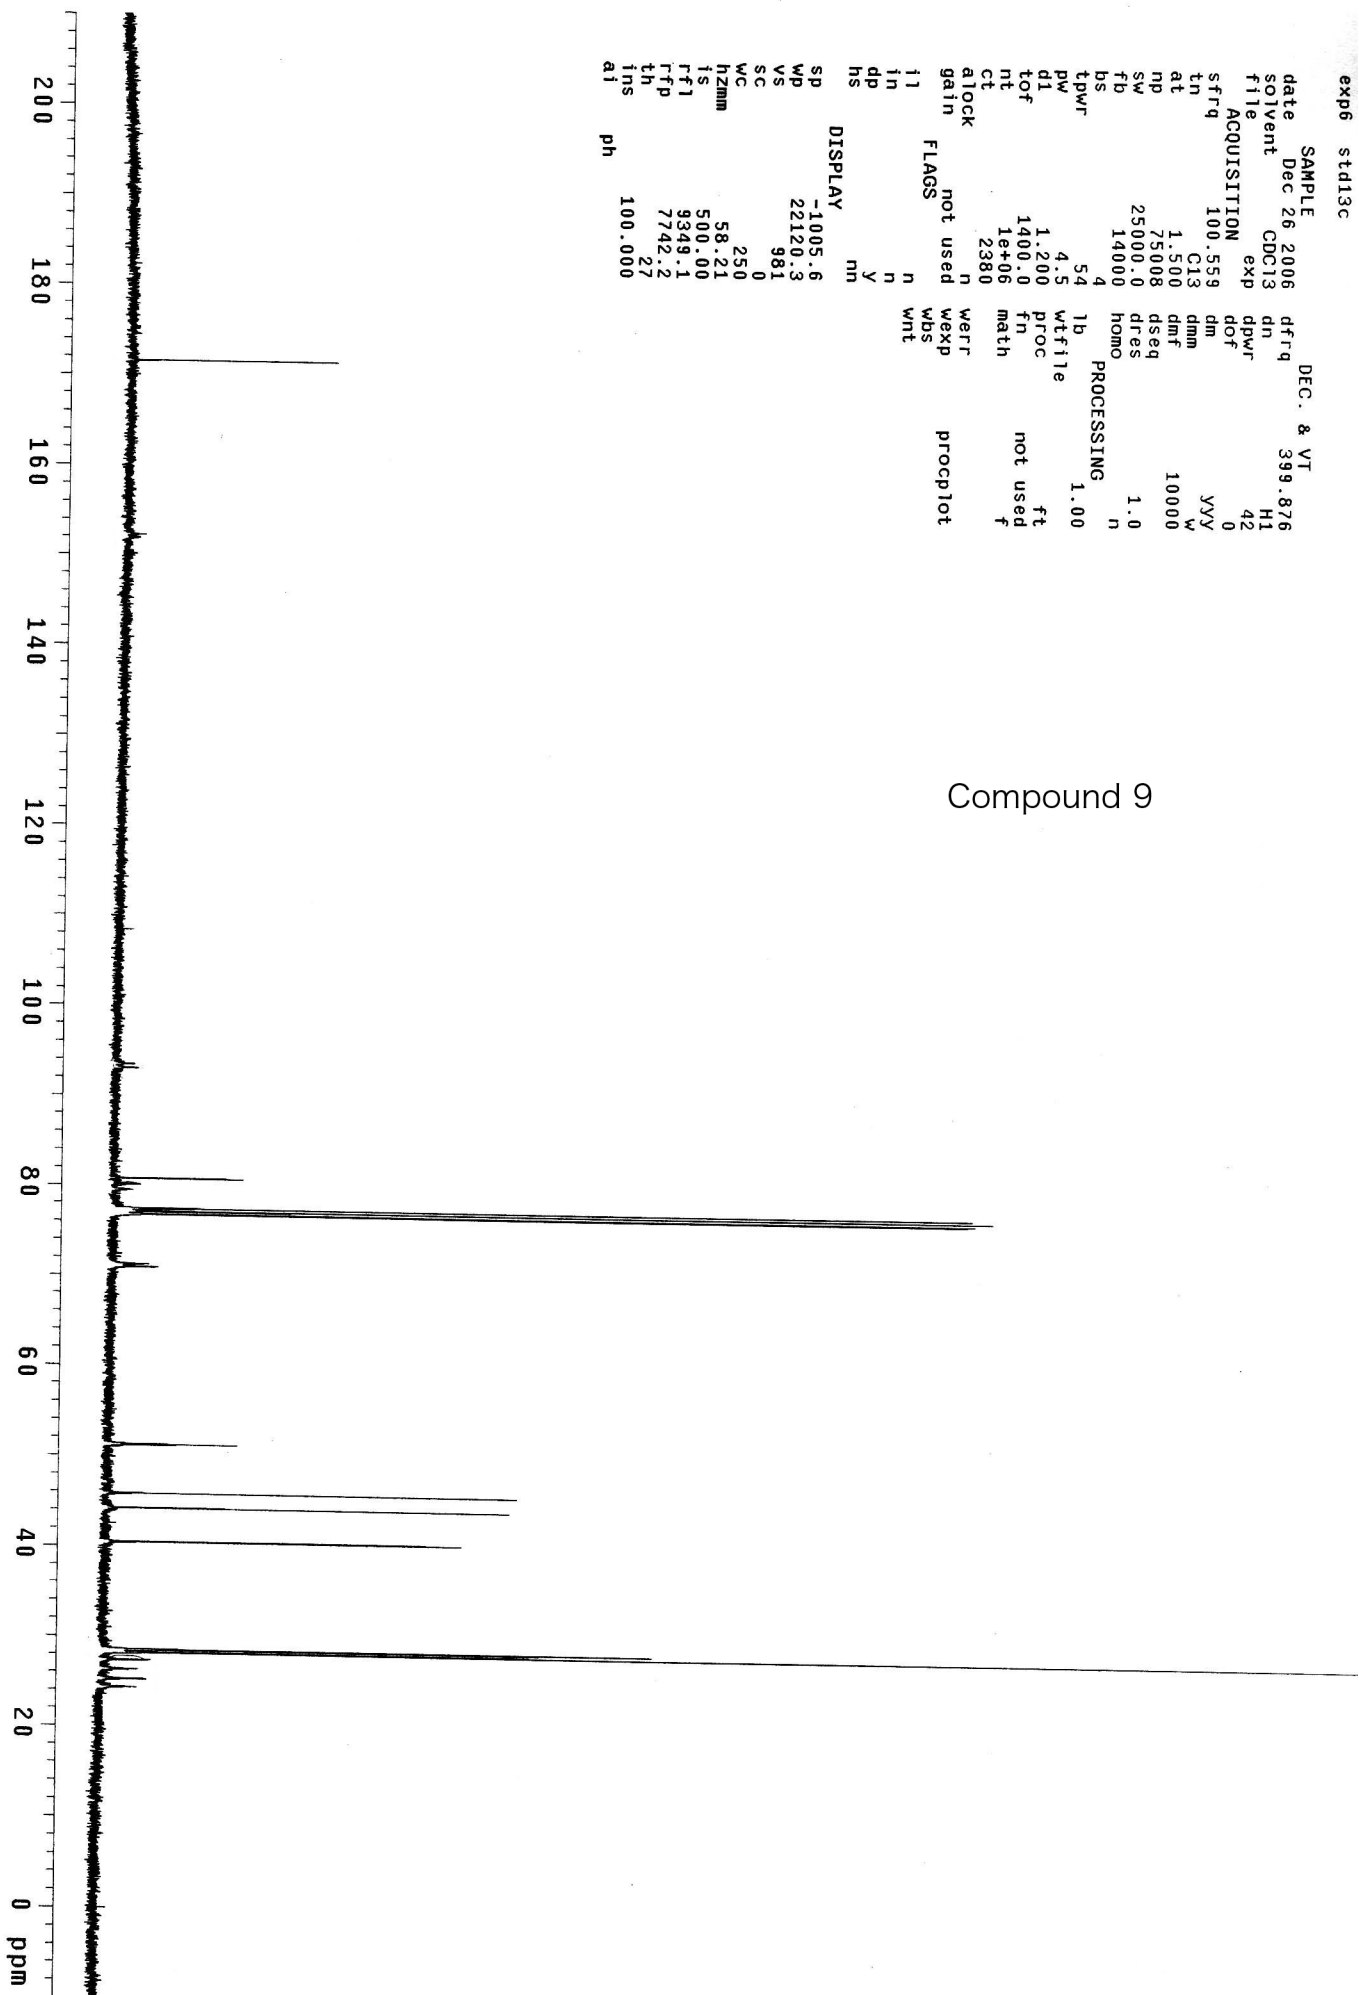





michael

exp6 std13c

```
SAMPLE      DEC. 8 VT
date Dec 19 2006  dfrq 399.876
solvent CDCl3      dn    H1
file ACQUISITION exp  qpwr 42
          100.559  dm    0
          C13      dmm    W
          1.500     dmf    10000
          7.5008   dseq   1.0
          25000.0  dres   n
          14000    homo   n
          4        PROCESSING 1.00
          tpwr     1b
          pw       4.5 wtfile
          dl       0.500 proc   ft
          tof     1400.0 fn    not used
          nt      1e+06 math   f
          ct      2600
          alock  n
          gain   not used  weft
          flags  not used  wexp
          l1     n         wbs
          l2     n         wnt
          dp     y
          hs     nn
          DISPLAY
          sp     -1005.6
          wp     22120.3
          vs     1474
          sc     0
          wc     250
          hzmm   88.48
          is     43.21
          rfl    9347.9
          rfp    7742.2
          th     24
          ins    100.000
          ai     ph
```

### Compound 8

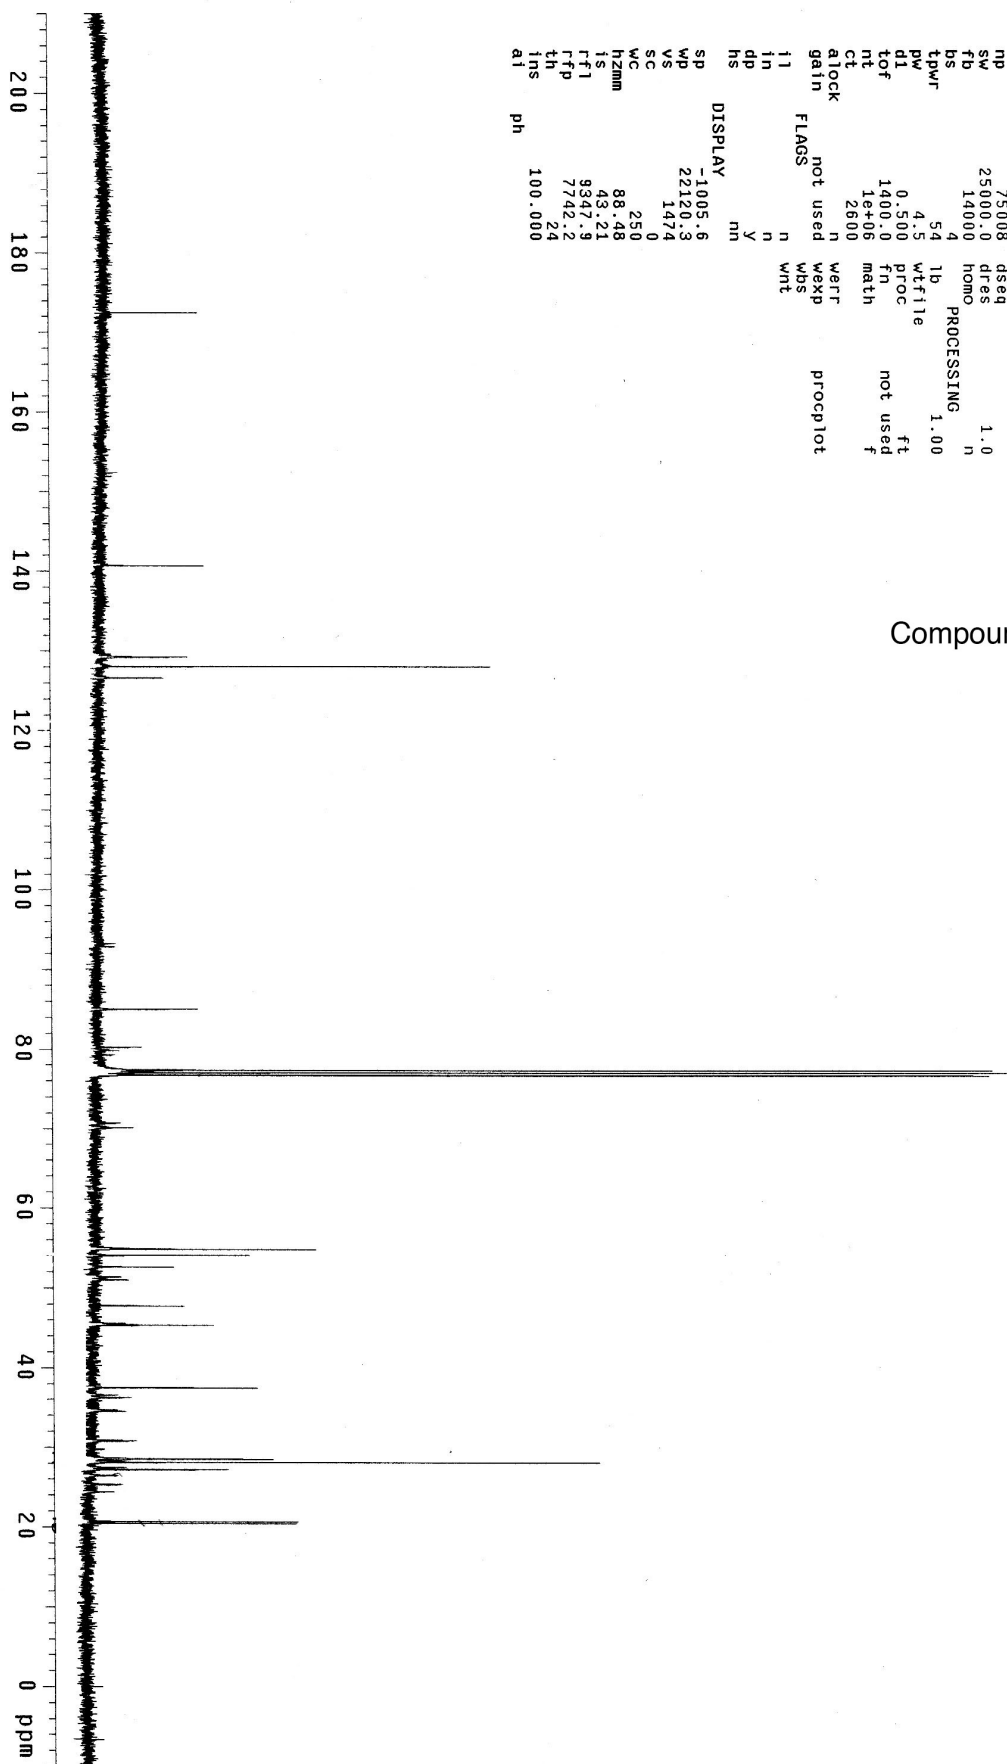

2-160

exptl sid1h

```
SAMPLE DEC. & VT
date Dec 5 2006 dfrq 399.876
solvent CDCl3 dn H1
file exp dpwr 30
ACQUISITION dof 0
sfrq 399.876 dm mmm
tn H1 dnm c
at 3.744 dnr 200
np 44328 dseq
sv 6000.8 dres 1.0
fd 3000 homo n
ls 16 PROCESSING
lpwr 60 wfile
pw 6.5 proc ft
dl 1.256 tn not used
tof 600.0 math f
nt 32
ct 32 werr
alock n wexp
gain not used wbs
flags not used wnt
il n
in n
dp y
hs nn
DISPLAY
sp -200.0
wp 4198.7
vs 39
wc 0
sc 250
h2mm 11.05
is 817.58
rfl 381.6
th 20
ins 20
ai 1.000
ph
```

compound 3

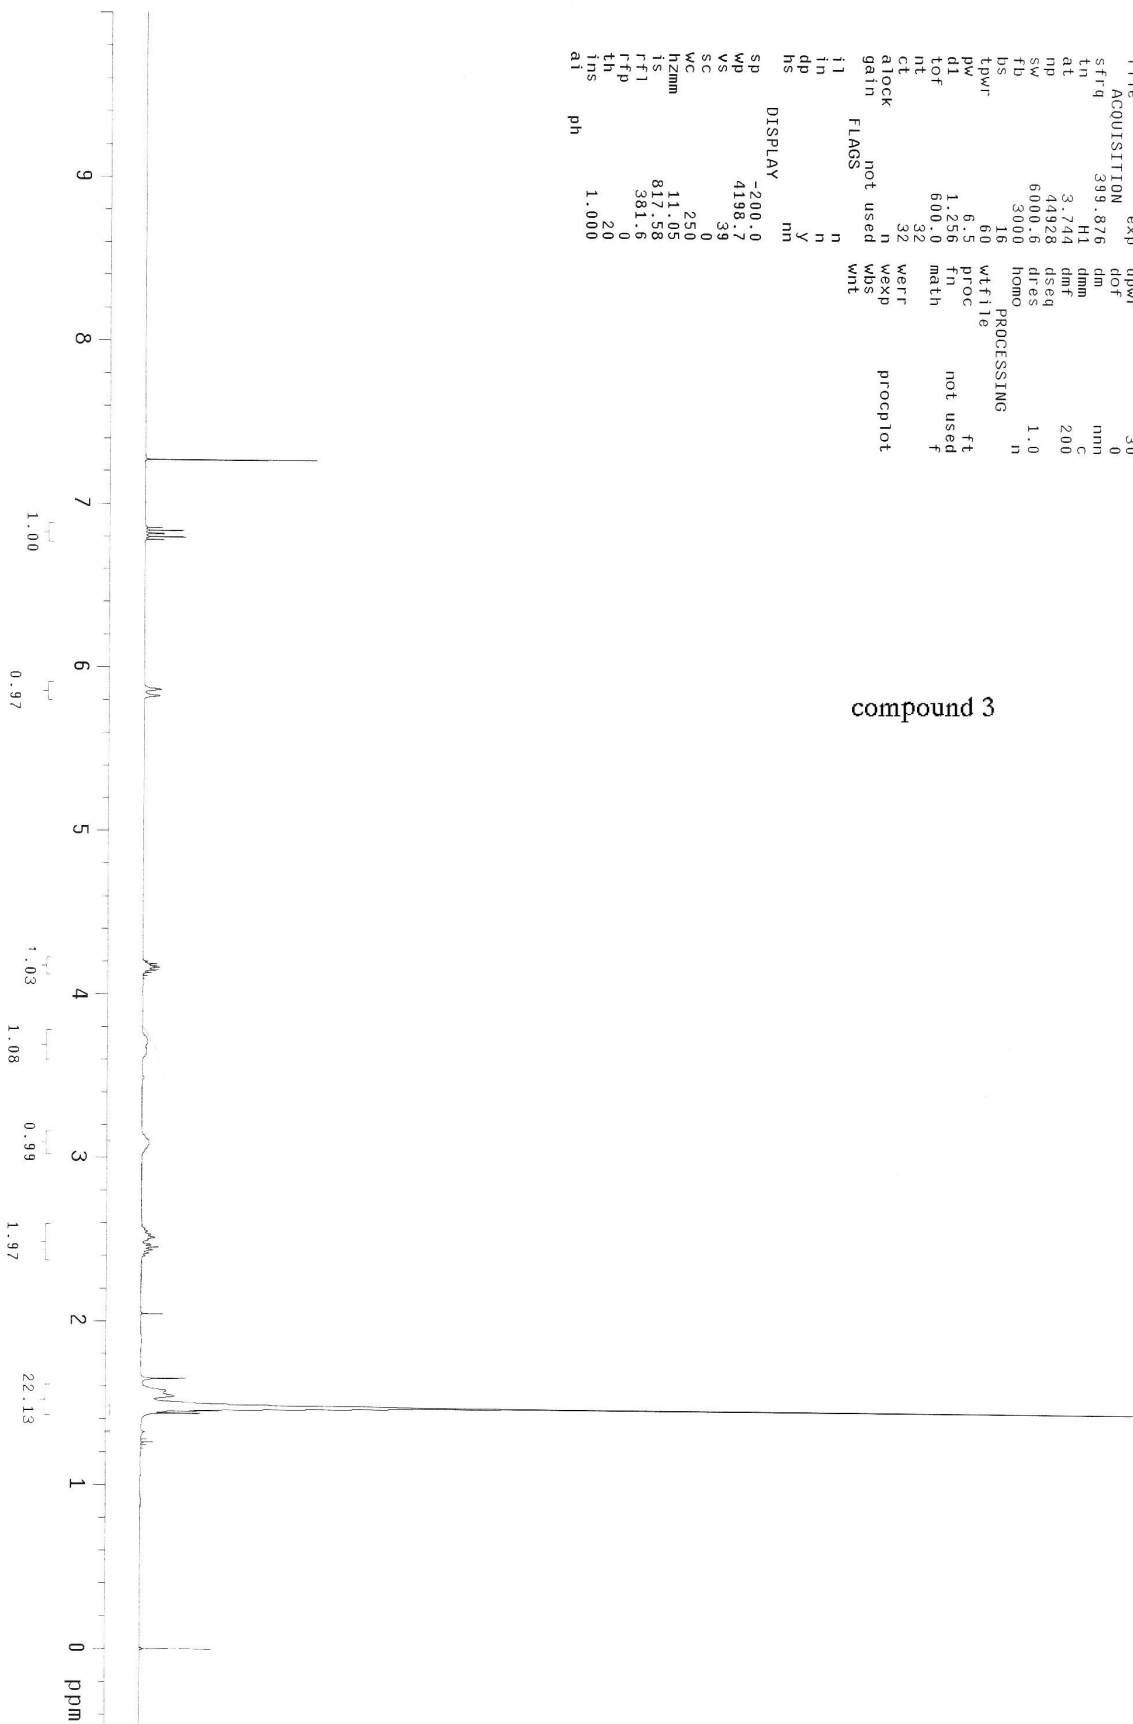

H-31-01-13G  
exp6 std13C

SAMPLE DEC: & VI  
date Dec 5 2006 dfrq 399.876  
solvent CDCl3 dn H1  
file exp dpwr 42  
ACQUISITION dof 0  
sfrq 100.559 dm YYY  
ln C13 dnm W  
at 1.500 dmf 100000  
np 75008 dseq  
sw 25000.0 dres 1.0  
fb 14000 homo  
bs 4  
tpwr 54 lb  
pw 4.5 wtfile  
dl 0.500 proc ft  
tof 1400.0 fn not used  
nt 100000 math not used  
ct 4800  
atlock  
gain not used wert  
gain not used wexp  
flags not used wnt  
DISPLAY  
sp -1005.6  
wp 22120.3  
vs 3696  
sc 0  
wc 250  
hzmh 88.48  
ls 500.00  
rfl 9347.9  
rffp 7742.2  
th 15  
ins 100.000  
ai ph

compound 3

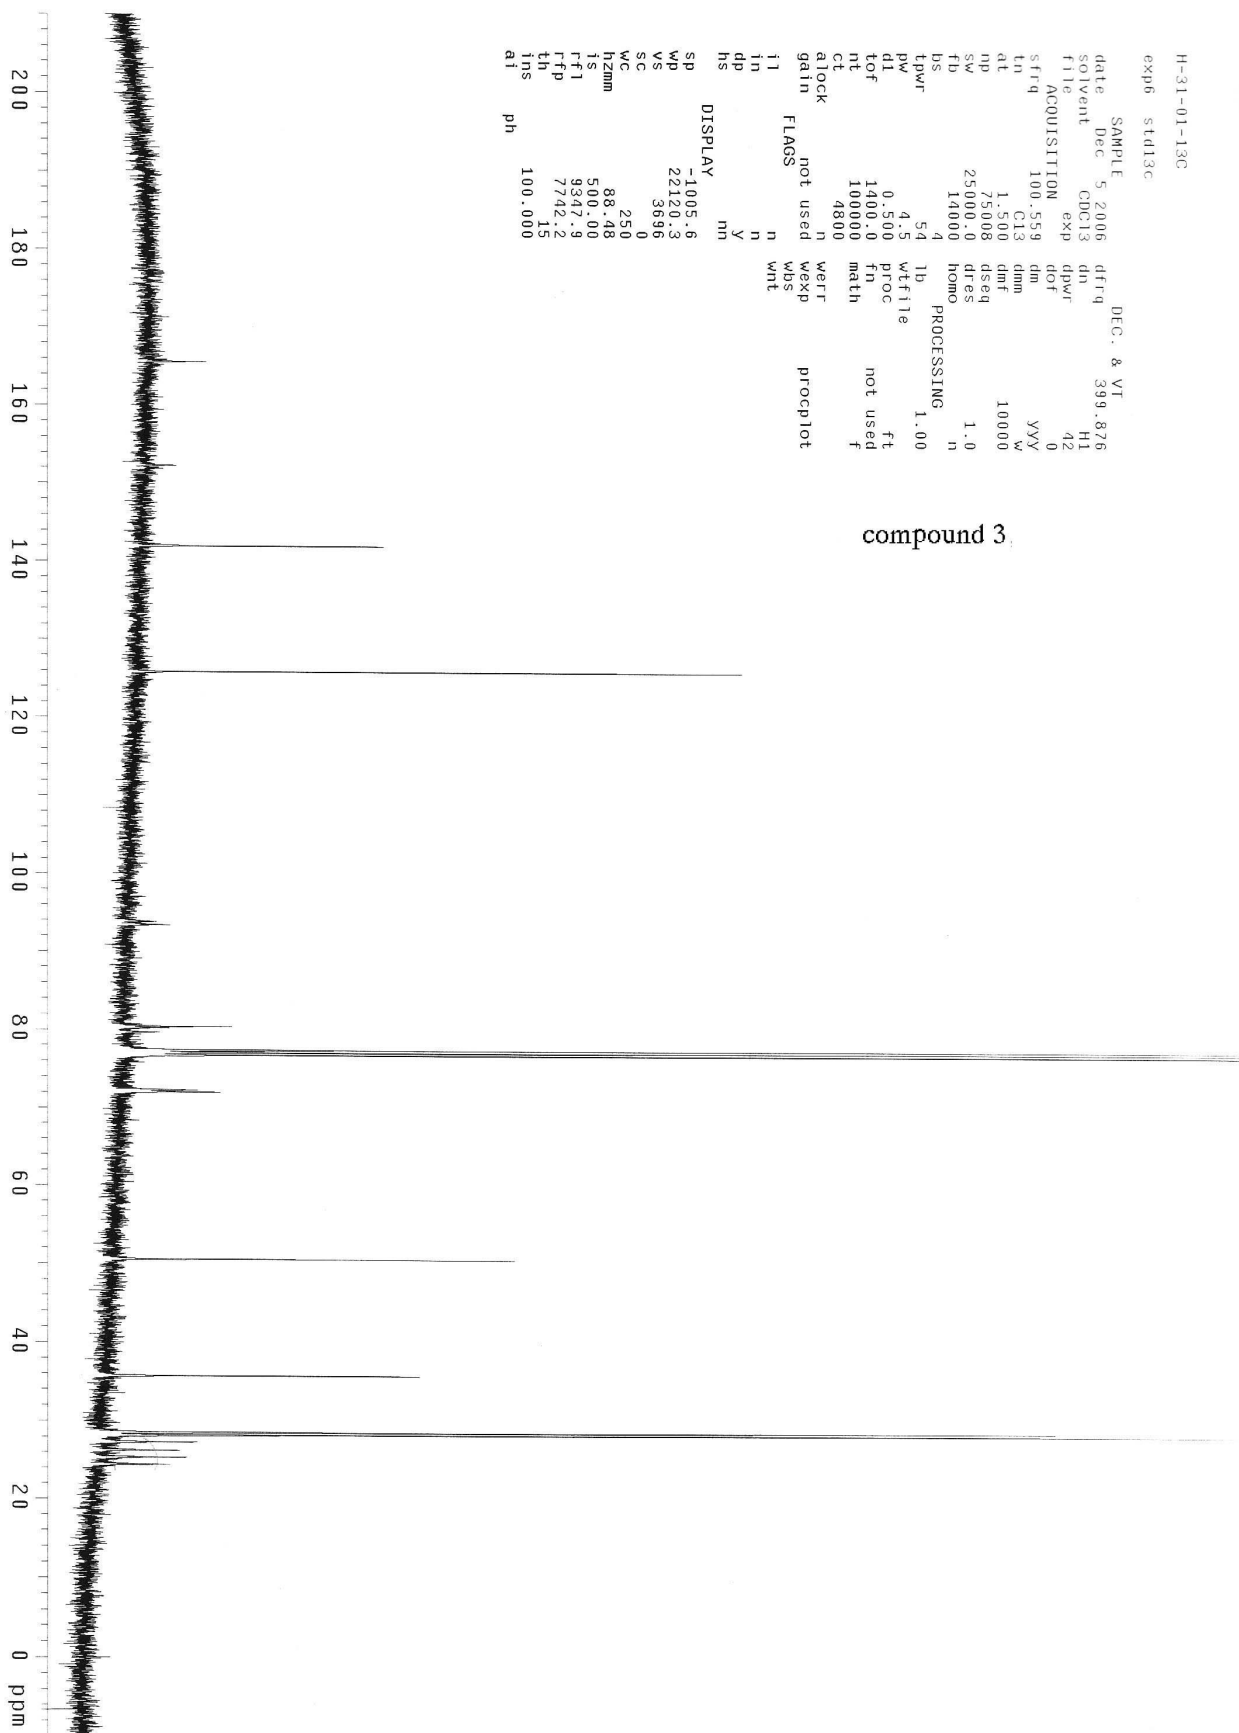

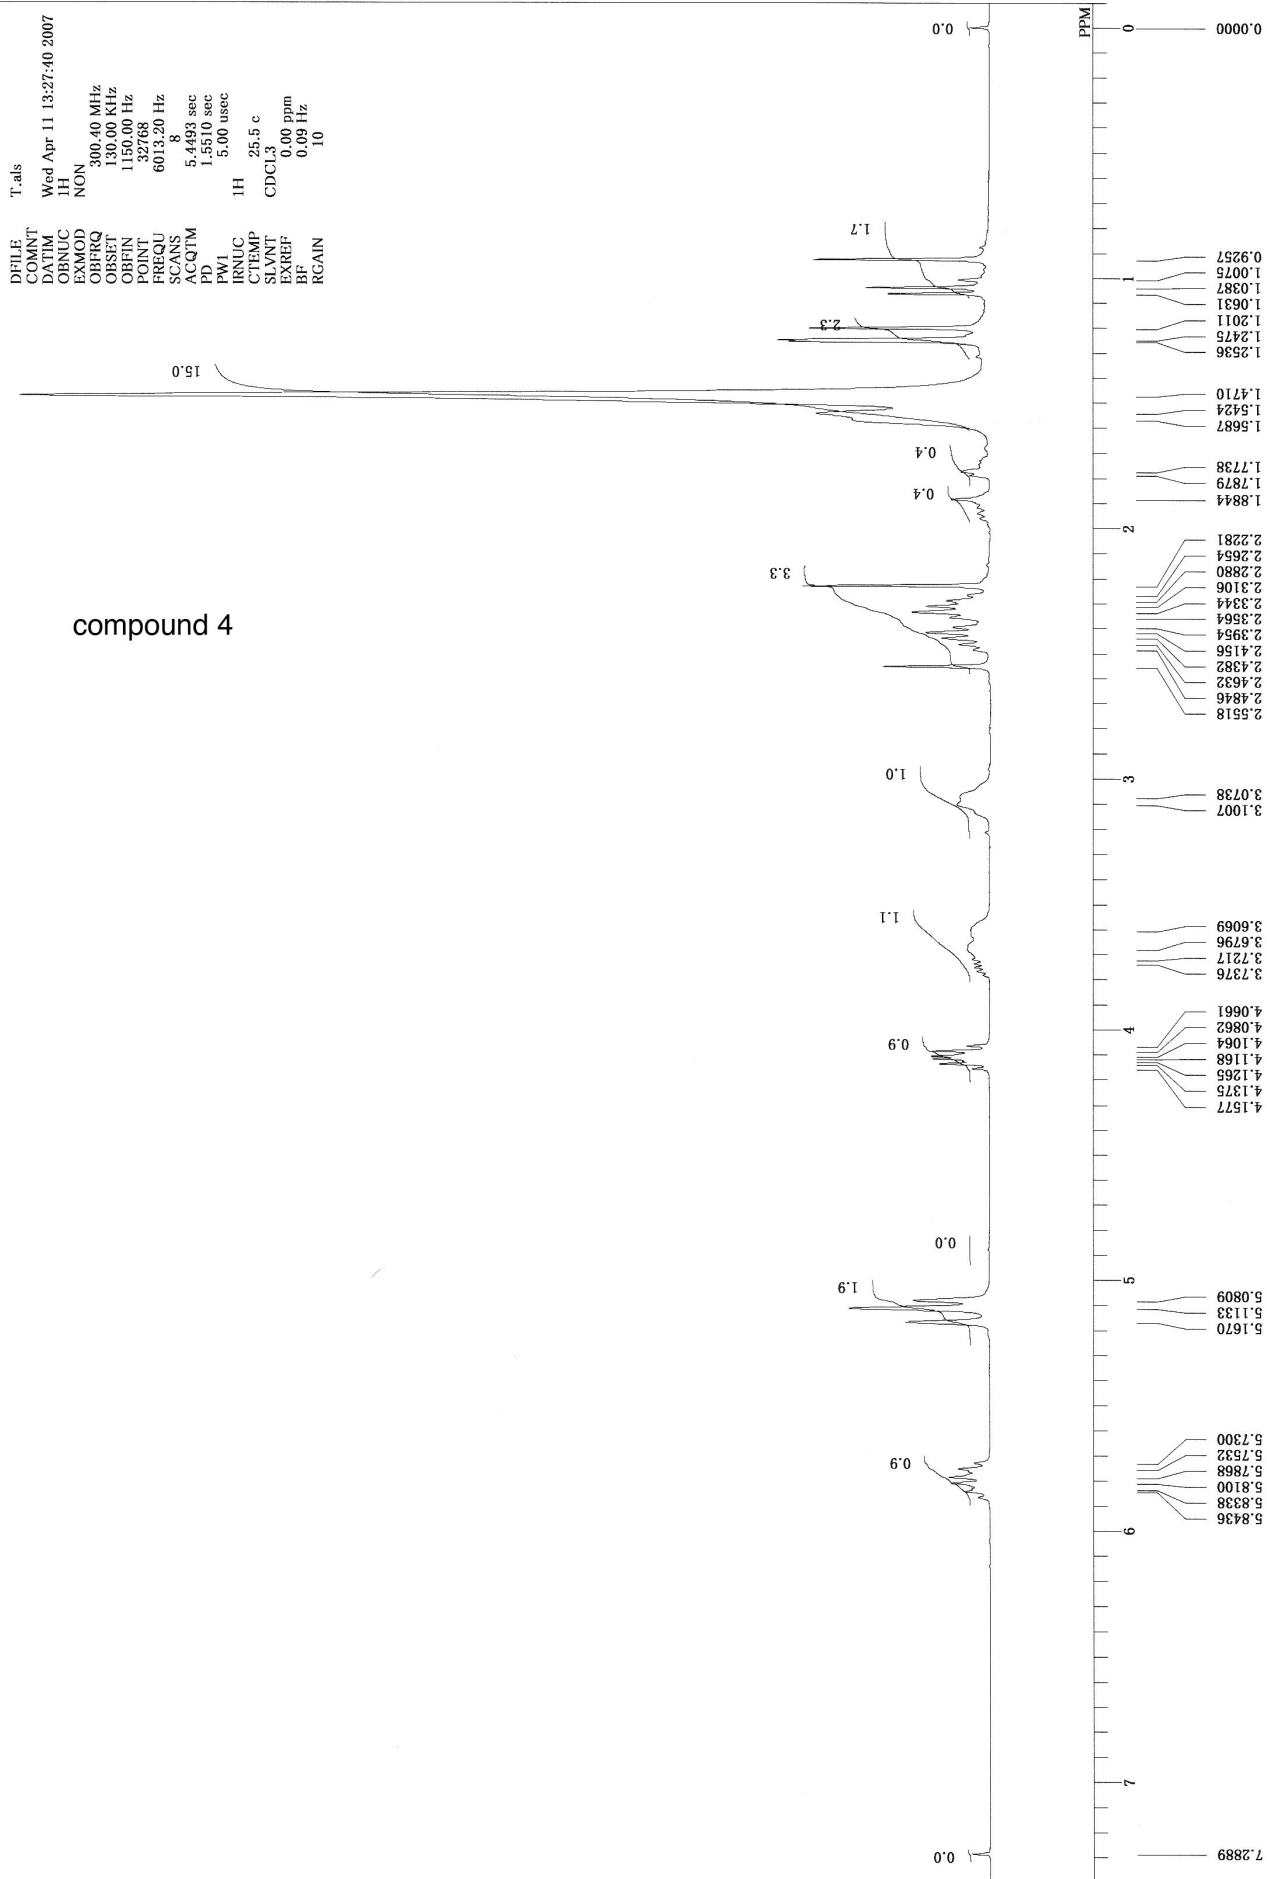

# Native (+)-Negamycin

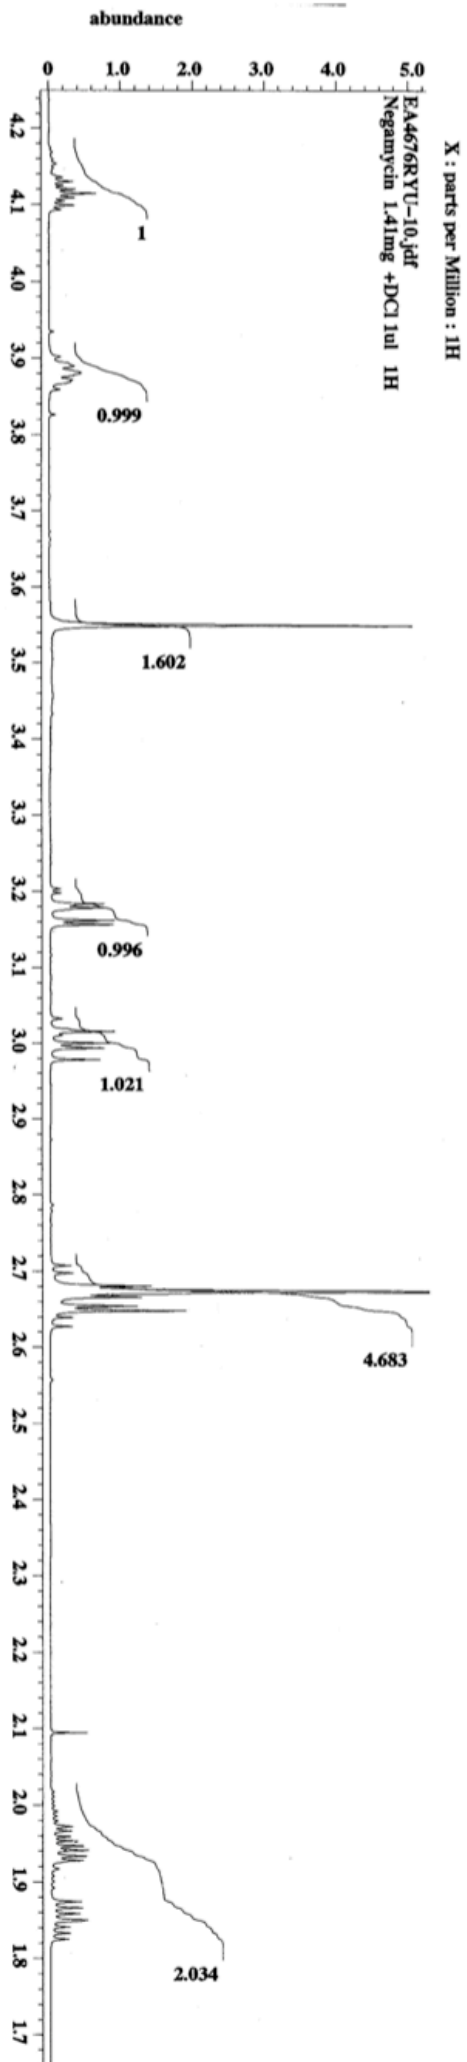

Supplement: b801498a.pdf [file b801498a.pdf]
